# Supplementary material for: Immunosuppressive treatment for idiopathic membranous nephropathy: An updated network meta-analysis
Source: PubMed Central journal article supplement (PMC9835199; doi:10.1515/biol-2022-0527), 2023-01-10

**Supplementary Figure 2. Direct meta-analysis for TR**

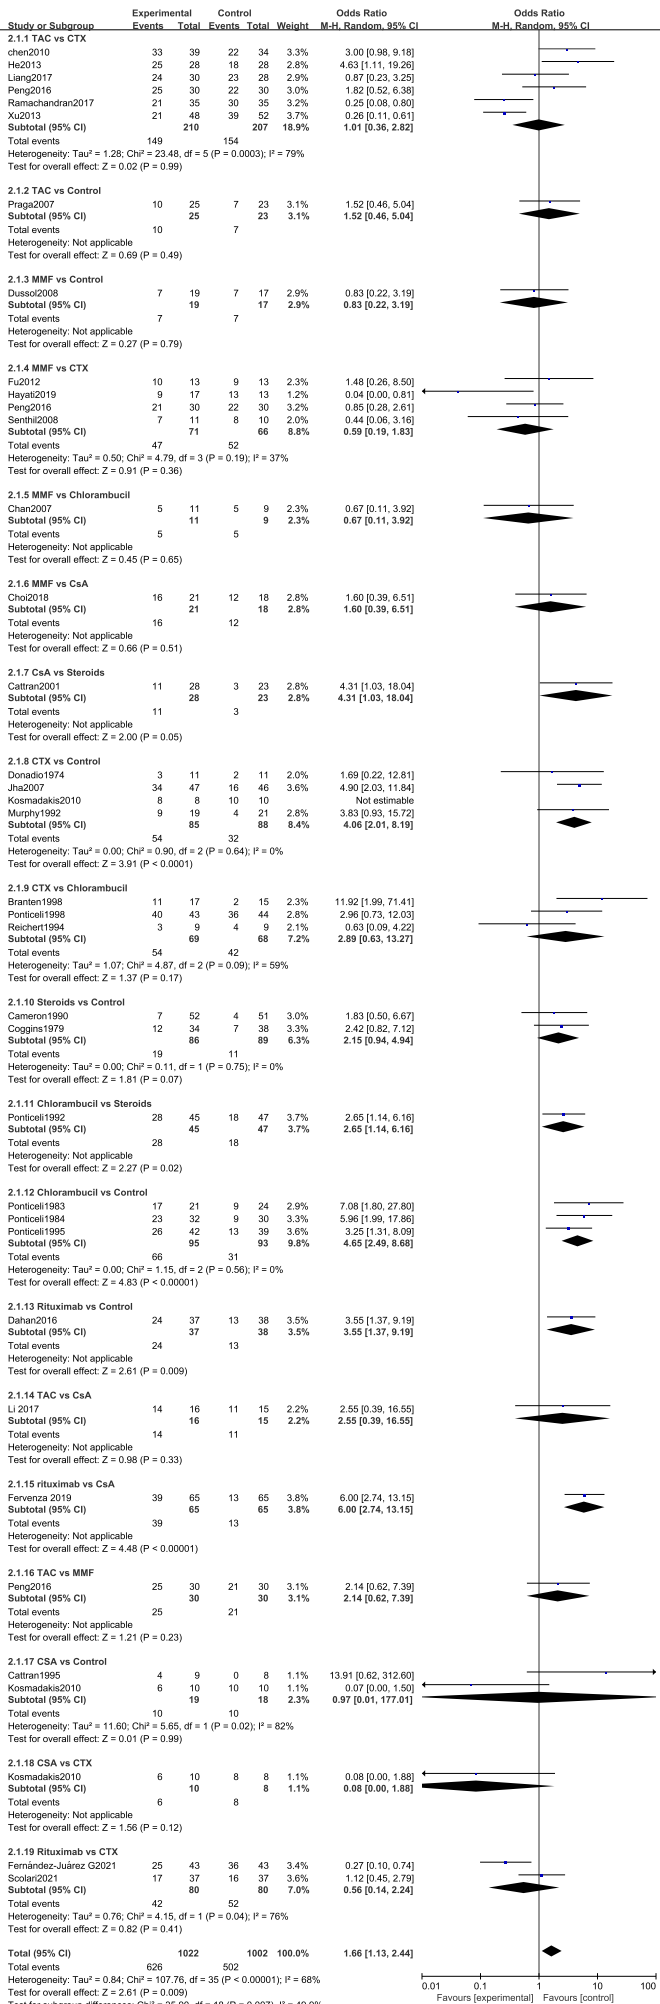

Supplement: SupFigure_2.Direct_meta-analysis_for_TR.pdf [file SupFigure_2.Direct_meta-analysis_for_TR.pdf]
