# Supplementary material for: Immunosuppressive treatment for idiopathic membranous nephropathy: An updated network meta-analysis
Source: PubMed Central journal article supplement (PMC9835199; doi:10.1515/biol-2022-0527), 2023-01-10
Supplement: SupFigure_3.Contribution_plots_for_CR.pdf [file SupFigure_3.Contribution_plots_for_CR.pdf]

|                    | AvsB | AvsC | AvsD | AvsH | BvsC | BvsD | BvsF | BvsH | CvsD | CvsE | CvsG | CvsH | DvsF | DvsG | DvsH | EvsF | EvsH | FvsH | GvsH |   |   |   |   |   |   |   |   |   |   |   |   |   |   |   |   |    |   |   |   |   |   |
|--------------------|------|------|------|------|------|------|------|------|------|------|------|------|------|------|------|------|------|------|------|---|---|---|---|---|---|---|---|---|---|---|---|---|---|---|---|----|---|---|---|---|---|
| Mixed estimates    |      |      |      |      |      |      |      |      |      |      |      |      |      |      |      |      |      |      |      |   |   |   |   |   |   |   |   |   |   |   |   |   |   |   |   |    |   |   |   |   |   |
| AvsB               | 24   | 37   | 22   | 66   | 6    | 12   | 33   | 4    | 2    | 6    | 0    | 5    | 0    | 2    | 0    | 2    | 0    | 1    | 0    | 1 | 0 | 5 | 0 | 6 | 1 | 3 | 1 | 1 | 2 | 1 | 0 | 2 |   |   |   |    |   |   |   |   |   |
| AvsC               | 10   | 8    | 2    | 8    | 9    | 6    | 21   | 2    | 5    | 2    | 0    | 0    | 2    | 0    | 1    | 7    | 5    | 5    | 2    | 3 | 8 | 3 | 0 | 1 | 5 | 3 | 1 | 0 | 7 | 1 | 7 | 3 | 4 | 0 | 6 |    |   |   |   |   |   |
| AvsD               | 14   | 0    | 6    | 7    | 3    | 2    | 2    | 7    | 6    | 1    | 5    | 1    | 4    | 9    | 0    | 5    | 2    | 9    | 0    | 8 | 1 | 2 | 0 | 4 | 5 | 1 | 2 | 4 | 3 | 1 | 1 | 8 | 1 | 1 | 2 | 7  | 1 | 2 |   |   |   |
| AvsH               | 9    | 1    | 5    | 7    | 1    | 6    | 1    | 3    | 6    | 0    | 1    | 2    | 3    | 3    | 4    | 3    | 4    | 0    | 3    | 2 | 9 | 0 | 7 | 1 | 9 | 9 | 1 | 2 | 6 | 6 | 4 | 4 | 0 | 7 | 0 | 8  | 4 | 3 | 3 |   |   |
| BvsC               | 10   | 8    | 1    | 6    | 3    | 9    | 0    | 1    | 1    | 6    | 7    | 1    | 3    | 0    | 2    | 3    | 7    | 3    | 4    | 9 | 3 | 6 | 2 | 8 | 1 | 5 | 3 | 3 | 1 | 2 | 2 | 7 | 2 | 2 | 1 | 8  | 0 | 4 |   |   |   |
| BvsD               | 12   | 6    | 0    | 8    | 1    | 2    | 4    | 0    | 9    | 5    | 5    | 4    | 2    | 9    | 4    | 5    | 3    | 0    | 2    | 6 | 0 | 6 | 1 | 1 | 0 | 4 | 5 | 6 | 2 | 2 | 8 | 0 | 5 | 0 | 1 | 0  | 6 | 1 | 1 |   |   |
| BvsF               | 7    | 7    | 0    | 3    | 1    | 8    | 5    | 6    | 4    | 0    | 1    | 8    | 4    | 7    | 7    | 3    | 8    | 0    | 2    | 2 | 5 | 0 | 4 | 1 | 2 | 1 | 4 | 8 | 1 | 6 | 3 | 9 | 7 | 6 | 5 | 1  | 1 | 4 | 2 | 0 |   |
| BvsH               | 8    | 8    | 0    | 3    | 0    | 1    | 8    | 4    | 4    | 5    | 1    | 8    | 3    | 5    | 7    | 5    | 1    | 0    | 1    | 2 | 7 | 0 | 5 | 1 | 8 | 8 | 2 | 9 | 6 | 6 | 4 | 8 | 7 | 5 | 9 | 6  | 3 | 4 |   |   |   |
| CvsD               | 1    | 6    | 1    | 5    | 0    | 1    | 2    | 8    | 0    | 6    | 1    | 2    | 5    | 1    | 4    | 0    | 0    | 2    | 0    | 1 | 9 | 2 | 5 | 3 | 4 | 4 | 3 | 0 | 5 | 5 | 4 | 8 | 3 | 1 | 3 | 1  | 2 | 2 | 2 | 0 | 4 |
| CvsE               | 0    | 6    | 9    | 9    | 3    | 3    | 6    | 1    | 8    | 0    | 3    | 2    | 3    | 1    | 2    | 3    | 5    | 1    | 7    | 3 | 2 | 9 | 3 | 3 | 8 | 0 | 0 | 3 | 3 | 9 | 1 | 0 | 3 | 1 | 9 | 0  | 0 | 8 | 2 | 7 |   |
| CvsG               | 1    | 0    | 1    | 0    | 6    | 7    | 5    | 2    | 1    | 8    | 7    | 8    | 3    | 0    | 8    | 0    | 6    | 6    | 2    | 4 | 3 | 8 | 4 | 2 | 5 | 1 | 3 | 2 | 3 | 7 | 0 | 4 | 1 | 1 | 3 | 2  | 0 | 6 | 8 | 6 |   |
| CvsH               | 0    | 4    | 1    | 0    | 9    | 3    | 3    | 8    | 2    | 9    | 5    | 3    | 7    | 3    | 0    | 3    | 1    | 6    | 0    | 6 | 7 | 3 | 5 | 4 | 1 | 7 | 4 | 0 | 1 | 5 | 6 | 2 | 5 | 9 | 2 | 8  | 0 | 3 | 6 |   |   |
| DvsF               | 0    | 1    | 0    | 9    | 6    | 8    | 5    | 9    | 0    | 8    | 9    | 0    | 5    | 9    | 2    | 3    | 1    | 7    | 2    | 5 | 0 | 3 | 1 | 1 | 2 | 1 | 5 | 2 | 5 | 6 | 6 | 8 | 6 | 6 | 1 | 1  | 3 | 1 | 3 | 2 |   |
| DvsG               | 0    | 6    | 2    | 7    | 4    | 6    | 2    | 5    | 2    | 4    | 5    | 0    | 9    | 1    | 1    | 2    | 1    | 0    | 1    | 7 | 3 | 5 | 0 | 4 | 2 | 0 | 3 | 2 | 2 | 2 | 2 | 1 | 3 | 6 | 1 | 2  | 6 | 1 | 2 | 6 |   |
| DvsH               | 1    | 1    | 0    | 9    | 8    | 4    | 8    | 6    | 1    | 2    | 9    | 2    | 3    | 2    | 3    | 6    | 2    | 0    | 2    | 5 | 0 | 2 | 1 | 7 | 1 | 3 | 7 | 4 | 7 | 9 | 3 | 5 | 8 | 8 | 3 | 1  | 0 | 1 | 4 | 5 |   |
| EvsF               | 0    | 9    | 0    | 8    | 1    | 8    | 1    | 9    | 1    | 0    | 0    | 6    | 2    | 2    | 1    | 0    | 0    | 7    | 2    | 4 | 0 | 2 | 0 | 3 | 6 | 4 | 1 | 1 | 2 | 1 | 3 | 0 | 5 | 7 | 9 | 4  | 1 | 0 | 4 | 1 | 0 |
| EvsH               | 0    | 5    | 1    | 0    | 0    | 7    | 2    | 1    | 0    | 5    | 0    | 1    | 1    | 0    | 0    | 9    | 0    | 3    | 2    | 8 | 0 | 3 | 0 | 7 | 2 | 9 | 0 | 7 | 1 | 9 | 1 | 6 | 5 | 4 | 0 | 1  | 7 | 4 | 1 | 0 |   |
| FvsH               | 1    | 3    | 2    | 5    | 3    | 9    | 0    | 6    | 0    | 6    | 3    | 2    | 1    | 8    | 0    | 5    | 0    | 2    | 0    | 1 | 0 | 9 | 9 | 2 | 1 | 8 | 3 | 8 | 1 | 8 | 1 | 8 | 3 | 1 | 0 | 1  | 9 | 1 | 0 | 1 | 9 |
| GvsH               | 0    | 6    | 1    | 0    | 4    | 4    | 6    | 0    | 5    | 4    | 8    | 2    | 2    | 2    | 5    | 0    | 3    | 2    | 3    | 5 | 1 | 1 | 5 | 8 | 8 | 2 | 4 | 3 | 6 | 0 | 3 | 6 | 6 | 0 | 7 | 4  | 1 | 2 | 5 |   |   |
| Indirect estimates |      |      |      |      |      |      |      |      |      |      |      |      |      |      |      |      |      |      |      |   |   |   |   |   |   |   |   |   |   |   |   |   |   |   |   |    |   |   |   |   |   |
| AvsE               | 7    | 7    | 5    | 2    | 1    | 3    | 2    | 1    | 0    | 10   | 3    | 1    | 9    | 3    | 3    | 2    | 3    | 0    | 1    | 3 | 8 | 0 | 4 | 1 | 2 | 8 | 9 | 1 | 8 | 4 | 4 | 1 | 0 | 4 | 1 | 10 | 8 | 2 | 2 |   |   |
| AvsF               | 9    | 0    | 5    | 1    | 1    | 5    | 9    | 7    | 0    | 4    | 2    | 4    | 5    | 0    | 1    | 9    | 0    | 5    | 2    | 5 | 0 | 6 | 1 | 2 | 1 | 3 | 9 | 1 | 2 | 3 | 3 | 8 | 1 | 5 | 6 | 1  | 2 | 2 | 1 | 8 |   |
| AvsG               | 9    | 6    | 6    | 8    | 2    | 0    | 7    | 2    | 0    | 6    | 7    | 2    | 1    | 0    | 0    | 8    | 0    | 6    | 0    | 5 | 6 | 0 | 0 | 3 | 0 | 1 | 2 | 7 | 8 | 0 | 1 | 0 | 2 | 0 | 7 | 0  | 6 | 9 | 7 |   |   |
| BvsE               | 7    | 1    | 0    | 8    | 0    | 4    | 6    | 0    | 4    | 0    | 1    | 6    | 4    | 5    | 2    | 3    | 8    | 0    | 3    | 3 | 6 | 0 | 3 | 1 | 2 | 8 | 8 | 2 | 1 | 4 | 6 | 1 | 2 | 0 | 2 | 0  | 2 | 0 | 2 | 3 |   |
| BvsG               | 8    | 3    | 1    | 4    | 4    | 6    | 2    | 3    | 5    | 1    | 2    | 3    | 3    | 3    | 4    | 2    | 6    | 0    | 2    | 0 | 3 | 5 | 7 | 0 | 2 | 0 | 1 | 2 | 7 | 0 | 5 | 1 | 2 | 1 | 5 | 2  | 2 | 9 | 4 |   |   |
| CvsF               | 1    | 2    | 1    | 0    | 7    | 4    | 5    | 5    | 0    | 8    | 9    | 3    | 7    | 4    | 7    | 1    | 7    | 5    | 7    | 6 | 0 | 3 | 1 | 3 | 2 | 1 | 2 | 3 | 1 | 0 | 2 | 7 | 9 | 0 | 3 | 0  | 1 | 0 | 7 | 2 | 1 |
| DvsE               | 0    | 7    | 1    | 3    | 6    | 6    | 6    | 0    | 1    | 3    | 7    | 6    | 3    | 2    | 2    | 5    | 1    | 8    | 3    | 6 | 0 | 3 | 1 | 1 | 1 | 2 | 8 | 3 | 5 | 6 | 6 | 1 | 8 | 4 | 2 | 0  | 2 | 6 | 3 | 2 |   |
| EvsG               | 0    | 3    | 0    | 4    | 3    | 3    | 4    | 0    | 0    | 2    | 4    | 0    | 2    | 3    | 1    | 6    | 0    | 4    | 3    | 3 | 4 | 4 | 1 | 0 | 8 | 7 | 2 | 0 | 5 | 4 | 1 | 1 | 0 | 7 | 0 | 8  | 0 | 2 | 9 | 9 |   |
| FvsG               | 0    | 3    | 0    | 9    | 2    | 4    | 3    | 1    | 0    | 9    | 3    | 9    | 3    | 9    | 1    | 1    | 2    | 0    | 4    | 7 | 0 | 9 | 1 | 3 | 5 | 2 | 9 | 3 | 1 | 8 | 0 | 6 | 0 | 1 | 2 | 3  | 0 | 1 | 0 |   |   |
| Entire network     | 5    | 1    | 5    | 2    | 7    | 8    | 5    | 6    | 4    | 2    | 9    | 1    | 3    | 2    | 2    | 1    | 2    | 3    | 3    | 1 | 2 | 6 | 1 | 5 | 8 | 0 | 8 | 6 | 3 | 7 | 7 | 2 | 1 | 0 | 6 | 5  | 4 | 3 |   |   |   |
| Included studies   | 1    | 1    | 6    | 1    | 1    | 4    | 1    | 1    | 1    | 1    | 1    | 1    | 1    | 1    | 1    | 1    | 1    | 1    | 1    | 1 | 1 | 1 | 1 | 1 | 3 | 2 | 3 | 1 | 2 | 3 | 1 |   |   |   |   |    |   |   |   |   |   |

**Supplementary Figure 3. Contribution plots for CR**

\*Note: A=TAC; B=MMF; C=CSA; D=CTX; E=STE; F=CHL; G=RTX; H=CON.
