# Supplementary material for: Immunosuppressive treatment for idiopathic membranous nephropathy: An updated network meta-analysis
Source: PubMed Central journal article supplement (PMC9835199; doi:10.1515/biol-2022-0527), 2023-01-10
Supplement: SupFigure_4.Contribution_plots_for_TR.pdf [file SupFigure_4.Contribution_plots_for_TR.pdf]

|                    | AvsB | AvsC | AvsD | AvsH | BvsC | BvsD | BvsF | BvsH | CvsD | CvsE | CvsG | CvsH | DvsF | DvsG | DvsH | EvsF | EvsH | FvsH | GvsH |   |   |    |    |    |    |   |    |   |    |   |    |   |    |   |   |   |    |    |   |   |   |
|--------------------|------|------|------|------|------|------|------|------|------|------|------|------|------|------|------|------|------|------|------|---|---|----|----|----|----|---|----|---|----|---|----|---|----|---|---|---|----|----|---|---|---|
| Mixed estimates    |      |      |      |      |      |      |      |      |      |      |      |      |      |      |      |      |      |      |      |   |   |    |    |    |    |   |    |   |    |   |    |   |    |   |   |   |    |    |   |   |   |
| AvsB               | 21   | 35   | 51   | 63   | 24   | 73   | 13   | 64   | 6    | 8    | 7    | 0    | 2    | 0    | 3    | 1    | 2    | 0    | 1    | 0 | 8 | 0  | 6  | 1  | 1  | 0 | 7  | 1 | 0  | 3 | 1  | 0 | 7  |   |   |   |    |    |   |   |   |
| AvsC               | 9    | 0    | 8    | 8    | 12   | 21   | 0    | 38   | 7    | 0    | 7    | 0    | 5    | 0    | 5    | 1    | 9    | 6    | 7    | 1 | 0 | 70 | 6  | 1  | 0  | 5 | 0  | 3 | 7  | 2 | 9  | 3 | 8  | 1 | 4 | 8 | 7  |    |   |   |   |
| AvsD               | 1    | 0    | 75   | 32   | 6    | 61   | 0    | 60   | 4    | 8    | 6    | 1    | 1    | 6    | 1    | 0    | 1    | 0    | 3    | 7 | 0 | 1  | 3  | 0  | 3  | 7 | 1  | 0 | 40 | 8 | 0  | 2 | 1  | 1 | 0 | 1 |    |    |   |   |   |
| AvsH               | 10   | 6    | 5    | 3    | 17   | 31   | 7    | 9    | 1    | 2    | 1    | 8    | 2    | 4    | 5    | 2    | 2    | 5    | 3    | 8 | 0 | 3  | 2  | 4  | 1  | 4 | 1  | 0 | 40 | 1 | 2  | 6 | 4  | 7 | 5 | 1 |    |    |   |   |   |
| BvsC               | 7    | 3    | 5    | 3    | 0    | 5    | 1    | 4    | 1    | 5    | 2    | 9    | 9    | 4    | 1    | 7    | 4    | 1    | 9    | 7 | 0 | 1  | 0  | 90 | 6  | 0 | 5  | 4 | 9  | 3 | 1  | 3 | 7  | 3 | 3 | 0 | 9  | 8  | 9 |   |   |
| BvsD               | 10   | 4    | 0    | 3    | 9    | 1    | 1    | 6    | 7    | 5    | 2    | 1    | 4    | 5    | 5    | 1    | 0    | 0    | 1    | 1 | 1 | 2  | 4  | 7  | 0  | 1 | 1  | 3 | 5  | 4 | 1  | 1 | 0  | 6 | 1 | 2 | 2  | 0  | 6 |   |   |
| BvsF               | 6    | 7    | 0    | 4    | 2    | 2    | 4    | 1    | 6    | 0    | 10   | 6    | 7    | 6    | 9    | 0    | 0    | 1    | 3    | 4 | 2 | 7  | 0  | 2  | 4  | 9 | 0  | 4 | 7  | 5 | 7  | 3 | 3  | 8 | 2 | 0 | 3  | 1  |   |   |   |
| BvsH               | 9    | 1    | 0    | 3    | 2    | 4    | 6    | 4    | 7    | 6    | 1    | 3    | 8    | 6    | 4    | 1    | 2    | 8    | 0    | 1 | 2 | 7  | 4  | 8  | 0  | 3 | 1  | 6 | 0  | 8 | 1  | 0 | 90 | 7 | 3 | 4 | 7  | 3  | 5 | 6 |   |
| CvsD               | 0    | 9    | 5    | 3    | 6    | 4    | 0    | 2    | 8    | 7    | 6    | 9    | 0    | 3    | 0    | 6    | 2    | 6    | 7    | 6 | 1 | 0  | 70 | 7  | 3  | 1 | 7  | 8 | 1  | 0 | 8  | 3 | 6  | 4 | 1 | 0 | 7  | 8  | 9 |   |   |
| CvsE               | 0    | 3    | 3    | 7    | 1    | 3    | 2    | 7    | 6    | 3    | 1    | 5    | 2    | 1    | 2    | 4    | 1    | 5    | 1    | 0 | 1 | 0  | 90 | 6  | 2  | 1 | 3  | 2 | 5  | 3 | 10 | 6 | 1  | 4 | 4 | 6 | 3  | 9  | 7 |   |   |
| CvsG               | 0    | 5    | 3    | 6    | 2    | 2    | 2    | 0    | 6    | 1    | 2    | 7    | 0    | 8    | 2    | 0    | 1    | 6    | 6    | 3 | 4 | 3  | 20 | 6  | 0  | 3 | 5  | 9 | 0  | 9 | 2  | 3 | 4  | 0 | 2 | 8 | 1  | 2  | 2 |   |   |
| CvsH               | 0    | 7    | 5    | 0    | 1    | 5    | 4    | 1    | 8    | 3    | 2    | 2    | 1    | 5    | 3    | 9    | 2    | 0    | 9    | 8 | 1 | 7  | 90 | 9  | 0  | 9 | 4  | 2 | 9  | 0 | 3  | 1 | 6  | 3 | 5 | 5 | 1  | 3  | 7 |   |   |
| DvsF               | 0    | 9    | 0    | 7    | 5    | 0    | 3    | 3    | 0    | 6    | 5    | 6    | 4    | 0    | 1    | 9    | 0    | 8    | 2    | 8 | 0 | 8  | 0  | 1  | 8  | 3 | 3  | 8 | 2  | 1 | 18 | 1 | 5  | 3 | 2 | 4 | 0  | 3  | 0 |   |   |
| DvsG               | 0    | 6    | 3    | 1    | 5    | 4    | 1    | 7    | 5    | 1    | 5    | 6    | 0    | 3    | 0    | 8    | 1    | 7    | 3    | 7 | 1 | 0  | 0  | 3  | 3  | 3 | 1  | 0 | 11 | 7 | 1  | 2 | 2  | 1 | 5 | 1 | 4  | 19 | 1 |   |   |
| DvsH               | 0    | 4    | 0    | 8    | 7    | 6    | 6    | 4    | 1    | 1    | 7    | 3    | 1    | 8    | 4    | 7    | 1    | 1    | 2    | 1 | 0 | 7  | 0  | 2  | 6  | 2 | 5  | 8 | 6  | 2 | 0  | 9 | 3  | 0 | 7 | 1 | 6  | 5  |   |   |   |
| EvsF               | 0    | 4    | 0    | 9    | 0    | 6    | 1    | 9    | 2    | 5    | 0    | 3    | 0    | 4    | 5    | 9    | 2    | 6    | 0    | 1 | 3 | 4  | 1  | 1  | 1  | 4 | 3  | 3 | 2  | 1 | 9  | 1 | 9  | 1 | 6 | 1 | 9  | 1  | 6 |   |   |
| EvsH               | 0    | 5    | 1    | 1    | 0    | 1    | 1    | 4    | 1    | 6    | 0    | 8    | 1    | 2    | 1    | 6    | 0    | 4    | 7    | 5 | 4 | 3  | 0  | 2  | 2  | 1 | 0  | 7 | 4  | 1 | 20 | 6 | 1  | 0 | 7 | 3 | 3  | 6  |   |   |   |
| FvsH               | 1    | 0    | 0    | 3    | 0    | 5    | 1    | 7    | 0    | 3    | 0    | 8    | 4    | 3    | 2    | 2    | 2    | 2    | 0    | 0 | 1 | 6  | 2  | 0  | 4  | 6 | 2  | 1 | 3  | 5 | 1  | 4 | 4  | 6 | 2 | 4 | 6  | 2  | 4 |   |   |
| GvsH               | 0    | 4    | 3    | 0    | 0    | 1    | 3    | 4    | 5    | 0    | 0    | 4    | 1    | 2    | 3    | 0    | 1    | 1    | 6    | 0 | 1 | 0  | 70 | 6  | 1  | 4 | 1  | 0 | 4  | 1 | 0  | 4 | 1  | 8 | 4 | 3 | 4  | 4  | 2 | 7 | 6 |
| Indirect estimates |      |      |      |      |      |      |      |      |      |      |      |      |      |      |      |      |      |      |      |   |   |    |    |    |    |   |    |   |    |   |    |   |    |   |   |   |    |    |   |   |   |
| AvsE               | 7    | 6    | 4    | 3    | 1    | 0    | 9    | 1    | 0    | 6    | 1    | 8    | 0    | 8    | 2    | 4    | 2    | 7    | 0    | 3 | 6 | 3  | 0  | 1  | 2  | 9 | 1  | 4 | 8  | 2 | 1  | 2 | 4  | 1 | 5 | 8 | 7  | 1  | 1 | 4 |   |
| AvsF               | 8    | 3    | 4    | 1    | 1    | 0    | 1    | 0    | 1    | 2    | 30   | 7    | 0    | 8    | 4    | 1    | 2    | 6    | 3    | 1 | 1 | 7  | 0  | 1  | 5  | 1 | 0  | 8 | 7  | 9 | 7  | 4 | 4  | 3 | 2 | 1 | 1  | 2  | 5 |   |   |
| AvsG               | 8    | 6    | 6    | 4    | 1    | 0    | 6    | 1    | 0    | 5    | 4    | 7    | 1    | 1    | 1    | 0    | 1    | 8    | 0    | 8 | 2 | 5  | 1  | 0  | 60 | 2 | 0  | 8 | 8  | 8 | 4  | 2 | 1  | 4 | 1 | 2 | 0  | 4  | 1 | 5 |   |
| BvsE               | 6    | 4    | 0    | 9    | 1    | 7    | 3    | 8    | 6    | 6    | 9    | 8    | 5    | 6    | 8    | 5    | 0    | 1    | 6    | 8 | 0 | 9  | 0  | 1  | 2  | 5 | 1  | 0 | 7  | 8 | 1  | 3 | 4  | 1 | 8 | 5 | 3  | 1  | 9 |   |   |
| BvsG               | 7    | 1    | 2    | 5    | 2    | 0    | 2    | 6    | 1    | 0    | 1    | 0    | 9    | 4    | 3    | 8    | 1    | 0    | 7    | 2 | 3 | 1  | 0  | 70 | 2  | 0 | 3  | 8 | 5  | 3 | 5  | 1 | 9  | 0 | 4 | 2 | 7  | 1  | 6 | 3 |   |
| CvsF               | 0    | 1    | 4    | 1    | 1    | 5    | 2    | 6    | 7    | 2    | 1    | 5    | 3    | 6    | 2    | 1    | 1    | 7    | 9    | 0 | 1 | 0  | 0  | 7  | 4  | 1 | 3  | 8 | 4  | 3 | 9  | 8 | 0  | 8 | 1 | 0 | 11 | 0  | 3 |   |   |
| DvsE               | 0    | 6    | 1    | 2    | 4    | 7    | 2    | 9    | 1    | 7    | 4    | 9    | 2    | 0    | 1    | 9    | 1    | 0    | 6    | 3 | 2 | 4  | 5  | 2  | 4  | 0 | 19 | 5 | 1  | 4 | 3  | 1 | 6  | 7 | 7 | 1 | 1  | 6  |   |   |   |
| EvsG               | 0    | 1    | 1    | 4    | 0    | 1    | 1    | 5    | 2    | 5    | 0    | 2    | 1    | 6    | 1    | 1    | 0    | 5    | 9    | 1 | 1 | 0  | 80 | 3  | 2  | 3 | 6  | 9 | 4  | 8 | 1  | 0 | 9  | 1 | 6 | 8 | 8  | 0  | 1 | 2 |   |
| FvsG               | 0    | 3    | 2    | 0    | 0    | 2    | 1    | 5    | 3    | 8    | 0    | 2    | 3    | 3    | 0    | 9    | 0    | 8    | 5    | 6 | 1 | 2  | 40 | 3  | 4  | 5 | 7  | 7 | 4  | 0 | 8  | 9 | 3  | 3 | 2 | 0 | 1  | 6  | 5 |   |   |
| Entire network     | 4    | 7    | 3    | 2    | 5    | 8    | 5    | 2    | 5    | 1    | 5    | 0    | 2    | 9    | 3    | 8    | 0    | 9    | 5    | 3 | 9 | 1  | 0  | 3  | 2  | 9 | 4  | 4 | 9  | 2 | 7  | 1 | 7  | 4 | 9 | 4 | 8  | 3  |   |   |   |
| Included studies   | 1    | 1    | 6    | 1    | 1    | 4    | 1    | 1    | 1    | 1    | 1    | 1    | 2    | 3    | 2    | 4    | 1    | 2    | 3    | 1 |   |    |    |    |    |   |    |   |    |   |    |   |    |   |   |   |    |    |   |   |   |

Supplementary Figure 4. Contribution plots for TR

\*Note: A=TAC; B=MMF; C=CSA; D=CTX; E=STE; F=CHL; G=RTX; H=CON.
