# Supplementary material for: Immunosuppressive treatment for idiopathic membranous nephropathy: An updated network meta-analysis
Source: PubMed Central journal article supplement (PMC9835199; doi:10.1515/biol-2022-0527), 2023-01-10
Supplement: SupTable_1.GRADE_Categories_of_Quality_of_Evidence.pdf [file SupTable_1.GRADE_Categories_of_Quality_of_Evidence.pdf]

*Supplementary Table 1: GRADE Categories of Quality of Evidence*

| GRADE QUALITY OF EVIDENCE | INTERPRETATION                                                                                                                 |
|---------------------------|--------------------------------------------------------------------------------------------------------------------------------|
| High                      | Further research is VERY UNLIKELY to change our confidence in the estimate of effect                                           |
| Moderate                  | Further research is LIKELY to have an impact on our confidence in the estimate of effect and MAY change the estimate           |
| Low                       | Further research is VERY LIKELY to have an impact on our confidence in estimate of effect and is LIKELY to change the estimate |
| Very Low                  | Any estimate of effect is very uncertain                                                                                       |

GRADE, Grading of Recommendations, Assessment, Development, and Evaluation.
