# Supplementary material for: Immunosuppressive treatment for idiopathic membranous nephropathy: An updated network meta-analysis
Source: PubMed Central journal article supplement (PMC9835199; doi:10.1515/biol-2022-0527), 2023-01-10
Supplement: SupTable_2.Retrieval_strategies.pdf [file SupTable_2.Retrieval_strategies.pdf]

|                                                                                                                           |           |
|---------------------------------------------------------------------------------------------------------------------------|-----------|
| #134.'controlled clinical trial'                                                                                          | 459,694   |
| #133.'randomized controlled trial'                                                                                        | 894,287   |
| #132.#127 OR #128 OR #129 OR #130 OR #131                                                                                 | 1,795,612 |
| #131.'steroids, catatoxic'                                                                                                | 0         |
| #130.'catatoxic steroids'                                                                                                 | 55        |
| #129.'steroids'                                                                                                           | 160,268   |
| #128.'steroid'                                                                                                            | 375,491   |
| #127.'steroid'/exp                                                                                                        | 1,717,229 |
| #126.#111 OR #112 OR #113 OR #114 OR #115 OR #116 OR #117 OR #118 OR #119 OR #120 OR #121 OR #122 OR #123 OR #124 OR #125 | 75,745    |
| #125.'rs61443'                                                                                                            | 28        |
| #124.'rs-61443'                                                                                                           | 311       |
| #123.'rs 61443'                                                                                                           | 311       |
| #122.'mycophenolate mofetil hydrochloride'                                                                                | 2         |
| #121.'mycophenolate mofetil hydrochloride'                                                                                | 2         |
| #120.'myfortic'                                                                                                           | 761       |
| #119.'mycophenolate, sodium'                                                                                              | 961       |
| #118.'sodium mycophenolate'                                                                                               | 60        |
| #117.'mycophenolate sodium'                                                                                               | 961       |
| #116.'cellcept'                                                                                                           | 3,529     |
| #115.'mycophenolic acid morpholinoethyl ester'                                                                            | 1         |
| #114.'mofetil, mycophenolate'                                                                                             | 155       |
| #113.'mycophenolate mofetil'                                                                                              | 60,355    |
| #112.'mycophenolic acid'                                                                                                  | 49,563    |
| #111.'mycophenolic acid'/exp                                                                                              | 19,828    |
| #110.#99 OR #100 OR #101 OR #102 OR #103 OR #104 OR #105 OR #106 OR #107 OR #108 OR #109                                  | 93,378    |
| #109.'rituxan'                                                                                                            | 3,218     |
| #108.'gp2013'                                                                                                             | 29        |
| #107.'idec c2b8'                                                                                                          | 116       |
| #106.'idec-c2b8'                                                                                                          | 116       |
| #105.'idec c2b8 antibody'                                                                                                 | 2         |
| #104.'idec-c2b8 antibody'                                                                                                 | 2         |
| #103.'mabthera'                                                                                                           | 2,267     |
| #102.'rituximab cd20 antibody'                                                                                            | 2         |
| #101.'cd20 antibody, rituximab'                                                                                           | 829       |
| #100.'rituximab'                                                                                                          | 93,328    |
| #99.'rituximab'/exp                                                                                                       | 88,445    |
| #98.#83 OR #84 OR #85 OR #86 OR #87 OR #88 OR #89 OR #90 OR #91 OR #92 OR #93 OR #94 OR #95 OR #96 OR #97                 | 19,894    |
| #97.'cb1348'                                                                                                              | 2         |
| #96.'cb 1348'                                                                                                             | 34        |

|                                                                                                                                    |         |
|------------------------------------------------------------------------------------------------------------------------------------|---------|
| #95. 'cb-1348'                                                                                                                     | 34      |
| #94. 'amboclorin'                                                                                                                  | 2       |
| #93. 'lympholysin'                                                                                                                 | 1       |
| #92. 'leukeran'                                                                                                                    | 1,106   |
| #91. 'nsc 3088'                                                                                                                    | 18      |
| #90. 'nsc 3088'                                                                                                                    | 18      |
| #89. 'nsc-3088'                                                                                                                    | 18      |
| #88. 'chlorbutin'                                                                                                                  | 29      |
| #87. 'chloraminophene'                                                                                                             | 132     |
| #86. 'n,n-di-(2-chloroethyl)-p-aminophenylbutyric acid'                                                                            | 1       |
| #85. '4-(bis(2-chloroethyl)amino)benzenebutanoic acid'                                                                             | 2       |
| #84. 'chlorambucil'                                                                                                                | 19,844  |
| #83. 'chlorambucil'/exp                                                                                                            | 19,274  |
| #82. #68 OR #69 OR #70 OR #71 OR #72 OR #73 OR #74 OR #75 OR #76 OR #77<br>OR #78 OR #79 OR #80 OR #81                             | 91,821  |
| #81. 'fk506'                                                                                                                       | 8,112   |
| #80. 'fk 506'                                                                                                                      | 13,444  |
| #79. 'fk-506'                                                                                                                      | 13,444  |
| #78. 'tacrolimus anhydrous'                                                                                                        | 0       |
| #77. 'tacrolimus anhydrous'                                                                                                        | 0       |
| #76. 'tacrolimus, anhydrous'                                                                                                       | 0       |
| #75. 'anhydrous tacrolimus'                                                                                                        | 0       |
| #74. 'fr900506'                                                                                                                    | 4       |
| #73. 'fr 900506'                                                                                                                   | 14      |
| #72. 'fr-900506'                                                                                                                   | 14      |
| #71. 'prograf'                                                                                                                     | 298     |
| #70. 'prograf'                                                                                                                     | 3,428   |
| #69. 'tacrolimus'                                                                                                                  | 88,138  |
| #68. 'tacrolimus'/exp                                                                                                              | 86,259  |
| #67. #49 OR #50 OR #51 OR #52 OR #53 OR #54 OR #55 OR #56 OR #57 OR #58<br>OR #59 OR #60 OR #61 OR #62 OR #63 OR #64 OR #65 OR #66 | 166,641 |
| #66. 'ol 27400'                                                                                                                    | 1       |
| #65. 'ol 27 400'                                                                                                                   | 3       |
| #64. 'ol 27-400'                                                                                                                   | 3       |
| #63. 'csaneoral'                                                                                                                   | 0       |
| #62. 'csa neoral'                                                                                                                  | 59      |
| #61. 'csa-neoral'                                                                                                                  | 59      |
| #60. 'sandimmun'                                                                                                                   | 2,698   |
| #59. 'sandimmune'                                                                                                                  | 2,948   |
| #58. 'cya nof'                                                                                                                     | 4       |
| #57. 'cya-nof'                                                                                                                     | 4       |
| #56. 'sandimmun neoral'                                                                                                            | 420     |
| #55. 'neoral'                                                                                                                      | 5,042   |
| #54. 'cyclosporin'                                                                                                                 | 131,664 |

|                                                                                                                                                                        |         |
|------------------------------------------------------------------------------------------------------------------------------------------------------------------------|---------|
| #53. 'ciclosporin'                                                                                                                                                     | 3,901   |
| #52. 'cyclosporin a'                                                                                                                                                   | 68,502  |
| #51. 'cyclosporine a'                                                                                                                                                  | 13,488  |
| #50. 'cyclosporine'                                                                                                                                                    | 161,669 |
| #49. 'cyclosporine'/exp                                                                                                                                                | 157,090 |
| #48. #26 OR #27 OR #28 OR #29 OR #30 OR #31 OR #32 OR #33 OR #34 OR #35<br>OR #36 OR #37 OR #38 OR #39 OR #40 OR #41 OR #42 OR #43 OR #44 OR #45<br>OR #46 OR #47      | 249,592 |
| #47. 'cyclophosphane'                                                                                                                                                  | 214     |
| #46. 'monohydrate'                                                                                                                                                     | 7,754   |
| #45. '(+,-)-2-(bis(2-chloroethyl)amino)tetrahydro-2h-1,3,2-oxazaphosphorine 2-oxide'                                                                                   | 9       |
| #44. 'procytox'                                                                                                                                                        | 80      |
| #43. 'nsc26271'                                                                                                                                                        | 1       |
| #42. 'nsc 26271'                                                                                                                                                       | 198     |
| #41. 'nsc-26271'                                                                                                                                                       | 198     |
| #40. 'neosar'                                                                                                                                                          | 201     |
| #39. 'endoxan'                                                                                                                                                         | 4,843   |
| #38. 'cytoxan'                                                                                                                                                         | 4,891   |
| #37. 'cytophosphan'                                                                                                                                                    | 18      |
| #36. 'cyclophosphamide monohydrate'                                                                                                                                    | 30      |
| #35. 'cytophosphane'                                                                                                                                                   | 2       |
| #34. 'cyclophosphamide, (s)-isomer'                                                                                                                                    | 0       |
| #33. 'cyclophosphamide, (r)-isomer'                                                                                                                                    | 0       |
| #32. 'cyclophosphamide anhydrous'                                                                                                                                      | 1       |
| #31. 'b518'                                                                                                                                                            | 63      |
| #30. 'b 518'                                                                                                                                                           | 14      |
| #29. 'b-518'                                                                                                                                                           | 14      |
| #28. 'sendoxan'                                                                                                                                                        | 107     |
| #27. 'cyclophosphamide'                                                                                                                                                | 241,519 |
| #26. 'cyclophosphamide'/exp                                                                                                                                            | 230,640 |
| #25. #1 OR #2 OR #3 OR #4 OR #5 OR #6 OR #7 OR #8 OR #9 OR #10 OR #11 OR<br>#12 OR #13 OR #14 OR #15 OR #16 OR #17 OR #18 OR #19 OR #20 OR #21 OR<br>#22 OR #23 OR #24 | 10,761  |
| #24. 'nephritis, heymann'                                                                                                                                              | 5       |
| #23. 'heyman nephritis'                                                                                                                                                | 738     |
| #22. 'nephropathy, idiopathic membranous'                                                                                                                              | 3       |
| #21. 'membranous nephropathy, idiopathic'                                                                                                                              | 4       |
| #20. 'idiopathic membranous nephropathy'                                                                                                                               | 1,188   |
| #19. 'membranous glomerulonephritis, idiopathic'                                                                                                                       | 2       |
| #18. 'membranous glomerulonephritides, idiopathic'                                                                                                                     | 0       |
| #17. 'idiopathic membranous glomerulonephritides'                                                                                                                      | 0       |
| #16. 'glomerulonephritis, idiopathic membranous'                                                                                                                       | 3       |
| #15. 'glomerulonephritides, idiopathic membranous'                                                                                                                     | 0       |

|                                                 |       |
|-------------------------------------------------|-------|
| #14. 'idiopathic membranous glomerulonephritis' | 206   |
| #13. 'glomerulonephropathy, membranous'         | 0     |
| #12. 'membranous glomerulonephropathy'          | 148   |
| #11. 'glomerulopathy, extramembranous'          | 0     |
| #10. 'extramembranous glomerulopathy'           | 9     |
| #9. 'membranous nephropathy'                    | 5,611 |
| #8. 'glomerulopathy, membranous'                | 6     |
| #7. 'membranous glomerulopathy'                 | 535   |
| #6. 'nephropathy, membranous'                   | 103   |
| #5. 'membranous glomerulonephritis'             | 8,951 |
| #4. 'membranous glomerulonephritides'           | 2     |
| #3. 'glomerulonephritides, membranous'          | 0     |
| #2. 'glomerulonephritis, membranous'            | 106   |
| #1. 'membranous glomerulonephritis'/exp         | 8,312 |

## Cochrane

Search Name: RCTs for IMN

Comment:

### ID Search

- #1 (Glomerulonephritis, Membranous):ti,ab,kw (Word variations have been searched)
- #2 (Glomerulonephritides, Membranous):ti,ab,kw (Word variations have been searched)
- #3 (Membranous Glomerulonephritides):ti,ab,kw (Word variations have been searched)
- #4 (Membranous Glomerulonephritis):ti,ab,kw (Word variations have been searched)
- #5 (Nephropathy, Membranous):ti,ab,kw (Word variations have been searched)
- #6 (Membranous Glomerulopathy):ti,ab,kw (Word variations have been searched)
- #7 (Glomerulopathy, Membranous):ti,ab,kw (Word variations have been searched)
- #8 (Membranous Nephropathy):ti,ab,kw (Word variations have been searched)
- #9 (Extramembranous Glomerulopathy):ti,ab,kw (Word variations have been searched)
- #10 (Glomerulopathy, Extramembranous):ti,ab,kw (Word variations have been searched)
- #11 (Membranous Glomerulonephropathy):ti,ab,kw (Word variations have been searched)
- #12 (Glomerulonephropathy, Membranous):ti,ab,kw (Word variations have been searched)
- #13 (Idiopathic Membranous Glomerulonephritis):ti,ab,kw (Word variations have been searched)
- #14 (Glomerulonephritides, Idiopathic Membranous):ti,ab,kw (Word variations have been searched)

#15 (Glomerulonephritis, Idiopathic Membranous):ti,ab,kw (Word variations have been searched)

#16 (Idiopathic Membranous Glomerulonephritides):ti,ab,kw (Word variations have been searched)

#17 (Membranous Glomerulonephritides, Idiopathic):ti,ab,kw (Word variations have been searched)

#18 (Membranous Glomerulonephritis, Idiopathic):ti,ab,kw (Word variations have been searched)

#19 (Idiopathic Membranous Nephropathy):ti,ab,kw (Word variations have been searched)

#20 (Membranous Nephropathy, Idiopathic):ti,ab,kw (Word variations have been searched)

#21 (Nephropathy, Idiopathic Membranous):ti,ab,kw (Word variations have been searched)

#22 (Heymann Nephritis):ti,ab,kw (Word variations have been searched)

#23 (Nephritis, Heymann):ti,ab,kw (Word variations have been searched)

#24 #1 OR #2 OR #3 OR #4 OR #5 OR #6 OR #7 OR #8 OR #9 OR #10 OR #11 OR #12 OR #13 OR #14 OR #15 OR #16 OR #17 OR #18 OR #19 OR #20 OR #21 OR #22 OR #23

#25 (cyclophosphamide):ti,ab,kw (Word variations have been searched)

#26 (Sendoxan):ti,ab,kw (Word variations have been searched)

#27 (B-518):ti,ab,kw (Word variations have been searched)

#28 (B 518):ti,ab,kw (Word variations have been searched)

#29 (B518):ti,ab,kw (Word variations have been searched)

#30 (Cyclophosphamide Anhydrous):ti,ab,kw (Word variations have been searched)

#31 (Cytophosphane):ti,ab,kw (Word variations have been searched)

#32 (Cyclophosphamide Monohydrate):ti,ab,kw (Word variations have been searched)

#33 (Cytophosphan):ti,ab,kw (Word variations have been searched)

#34 (Cytosan):ti,ab,kw (Word variations have been searched)

#35 (Endoxan):ti,ab,kw (Word variations have been searched)

#36 (Neosar):ti,ab,kw (Word variations have been searched)

#37 (NSC-26271):ti,ab,kw (Word variations have been searched)

#38 (NSC 26271):ti,ab,kw (Word variations have been searched)

#39 (NSC26271):ti,ab,kw (Word variations have been searched)

#40 (Procytox):ti,ab,kw (Word variations have been searched)

#41 (Monohydrate):ti,ab,kw (Word variations have been searched)

#42 (Cyclophosphane):ti,ab,kw (Word variations have been searched)

#43 #25 OR #26 OR #27 OR #28 OR #29 OR #30 OR #31 OR #32 OR #33 OR #34 OR #35 OR #36 OR #37 OR #38 OR #39 OR #40 OR #41 OR #42

#44 (Cyclosporine):ti,ab,kw (Word variations have been searched)

#45 (Cyclosporine A):ti,ab,kw (Word variations have been searched)

#46 (Cyclosporin A):ti,ab,kw (Word variations have been searched)

#47 (Ciclosporin):ti,ab,kw (Word variations have been searched)

#48 (Cyclosporin):ti,ab,kw (Word variations have been searched)

#49 (Neoral):ti,ab,kw (Word variations have been searched)  
#50 (Sandimmun Neoral):ti,ab,kw (Word variations have been searched)  
#51 (CyA-NOF):ti,ab,kw (Word variations have been searched)  
#52 (CyA NOF):ti,ab,kw (Word variations have been searched)  
#53 (Sandimmune):ti,ab,kw (Word variations have been searched)  
#54 (Sandimmun):ti,ab,kw (Word variations have been searched)  
#55 (CsA-Neoral):ti,ab,kw (Word variations have been searched)  
#56 (CsA Neoral):ti,ab,kw (Word variations have been searched)  
#57 (CsANeoral):ti,ab,kw (Word variations have been searched)  
#58 (OL 27 400):ti,ab,kw (Word variations have been searched)  
#59 (OL 27400):ti,ab,kw (Word variations have been searched)  
#60 #44 OR #45 OR #46 OR #47 OR #48 OR #49 OR #50 OR #51 OR #52 OR #53  
OR #54 OR #55 OR #56 OR #57 OR #58 OR #59  
#61 (Tacrolimus):ti,ab,kw (Word variations have been searched)  
#62 (Prograf):ti,ab,kw (Word variations have been searched)  
#63 (Prograft):ti,ab,kw (Word variations have been searched)  
#64 (FR-900506):ti,ab,kw (Word variations have been searched)  
#65 (FR 900506):ti,ab,kw (Word variations have been searched)  
#66 (FR900506):ti,ab,kw (Word variations have been searched)  
#67 (Anhydrous Tacrolimus):ti,ab,kw (Word variations have been searched)  
#68 (Tacrolimus, Anhydrous):ti,ab,kw (Word variations have been searched)  
#69 (Tacrolimus Anhydrous):ti,ab,kw (Word variations have been searched)  
#70 (Anhydrous, Tacrolimus):ti,ab,kw (Word variations have been searched)  
#71 (FK-506):ti,ab,kw (Word variations have been searched)  
#72 (FK 506):ti,ab,kw (Word variations have been searched)  
#73 (FK506):ti,ab,kw (Word variations have been searched)  
#74 #61 OR #62 OR #63 OR #64 OR #65 OR #66 OR #67 OR #68 OR #69 OR #70  
OR #71 OR #72 OR #73  
#75 (Chlorambucil):ti,ab,kw (Word variations have been searched)  
#76 (Chloraminophene):ti,ab,kw (Word variations have been searched)  
#77 (Chlorbutin):ti,ab,kw (Word variations have been searched)  
#78 (NSC-3088):ti,ab,kw (Word variations have been searched)  
#79 (NSC 3088):ti,ab,kw (Word variations have been searched)  
#80 (NSC3088):ti,ab,kw (Word variations have been searched)  
#81 (Leukeran):ti,ab,kw (Word variations have been searched)  
#82 (Lympholysin):ti,ab,kw (Word variations have been searched)  
#83 (Amboclorin):ti,ab,kw (Word variations have been searched)  
#84 (CB-1348):ti,ab,kw (Word variations have been searched)  
#85 (CB 1348):ti,ab,kw (Word variations have been searched)  
#86 (CB1348):ti,ab,kw (Word variations have been searched)  
#87 #75 OR #76 OR #77 OR #78 OR #79 OR #80 OR #81 OR #82 OR #83 OR #84  
OR #85 OR #86  
#88 (Rituximab):ti,ab,kw (Word variations have been searched)  
#89 (CD20 Antibody, Rituximab):ti,ab,kw (Word variations have been searched)



#90 (Rituximab CD20 Antibody):ti,ab,kw (Word variations have been searched)  
#91 (Mabthera):ti,ab,kw (Word variations have been searched)  
#92 (IDEC-C2B8 Antibody):ti,ab,kw (Word variations have been searched)  
#93 (IDEC C2B8 Antibody):ti,ab,kw (Word variations have been searched)  
#94 (IDEC-C2B8):ti,ab,kw (Word variations have been searched)  
#95 (IDEC C2B8):ti,ab,kw (Word variations have been searched)  
#96 (GP2013):ti,ab,kw (Word variations have been searched)  
#97 (Rituxan):ti,ab,kw (Word variations have been searched)  
#98 #88 OR #89 OR #90 OR #91 OR #92 OR #93 OR #94 OR #95 OR #96 OR #97  
#99 (Mycophenolic Acid):ti,ab,kw (Word variations have been searched)  
#100 (Mycophenolate Mofetil):ti,ab,kw (Word variations have been searched)  
#101 (Mofetil, Mycophenolate):ti,ab,kw (Word variations have been searched)  
#102 (Mycophenolic Acid Morpholinoethyl Ester):ti,ab,kw (Word variations have been searched)  
#103 (Cellcept):ti,ab,kw (Word variations have been searched)  
#104 (Mycophenolate Sodium):ti,ab,kw (Word variations have been searched)  
#105 (Sodium Mycophenolate):ti,ab,kw (Word variations have been searched)  
#106 (Mycophenolate, Sodium):ti,ab,kw (Word variations have been searched)  
#107 (Myfortic):ti,ab,kw (Word variations have been searched)  
#108 (Mycophenolate Mofetil Hydrochloride):ti,ab,kw (Word variations have been searched)  
#109 (Mofetil Hydrochloride, Mycophenolate):ti,ab,kw (Word variations have been searched)  
#110 (RS 61443):ti,ab,kw (Word variations have been searched)  
#111 (RS-61443):ti,ab,kw (Word variations have been searched)  
#112 (RS61443):ti,ab,kw (Word variations have been searched)  
#113 #99 OR #100 OR #101 OR #102 OR #103 OR #104 OR #105 OR #106 OR #107 OR #108 OR #109 OR #110 OR #111 OR #112  
#114 (Steroids):ti,ab,kw (Word variations have been searched)  
#115 (Steroid):ti,ab,kw (Word variations have been searched)  
#116 (Catatonic Steroids):ti,ab,kw (Word variations have been searched)  
#117 (Steroids, Catatonic):ti,ab,kw (Word variations have been searched)  
#118 #114 OR #115 OR #116 OR #117  
#119 (randomized controlled trial):ti,ab,kw (Word variations have been searched)  
#120 (controlled clinical trial):ti,ab,kw (Word variations have been searched)  
#121 (random):ti,ab,kw (Word variations have been searched)  
#122 (control):ti,ab,kw (Word variations have been searched)  
#123 (trial):ti,ab,kw (Word variations have been searched)  
#124 #119 OR #120 OR #121 OR #122 OR #123  
#125 #43 OR #60 OR #74 OR #87 OR #98 OR #113 OR #118  
#126 #24 AND #124 AND #125 **231**
