# Supplementary material for: Immunosuppressive treatment for idiopathic membranous nephropathy: An updated network meta-analysis
Source: PubMed Central journal article supplement (PMC9835199; doi:10.1515/biol-2022-0527), 2023-01-10
Supplement: SupTable_3.Baseline_of_patients_in_the_RCTs.pdf [file SupTable_3.Baseline_of_patients_in_the_RCTs.pdf]

**Supplementary Table 3. Baseline characteristics of patients in the RCTs**

| First author                 | Year | Nation     | Follo w-up time | Mean Age(y)                | Gender (M/F)                  | Sample               | Histology grading of IMN                  | Urine Protein (g/24hr)     | Albumin (g/L)              | Scr (umol/L)               |
|------------------------------|------|------------|-----------------|----------------------------|-------------------------------|----------------------|-------------------------------------------|----------------------------|----------------------------|----------------------------|
| <b>TAC vs CTX</b>            |      |            |                 |                            |                               |                      |                                           |                            |                            |                            |
| Chen                         | 2010 | China      | 12              | T:47.2<br>C:48.6           | T:23/16<br>C:18/16            | 39/34                | T:16/21/2/0<br>C:16/17/1/0                | T:7.71<br>C:7.28           | T:23.1<br>C:23.1           | T:75.7<br>C:85.0           |
| He                           | 2013 | China      | 12              | T:45.4<br>C:47.2           | T:20/8<br>C:19/9              | 28/28                | T:12/9/5/2<br>C:13/11/3/1                 | T:6.76<br>C:6.38           | T:19.8<br>C:20.6           | T:81.56<br>C:82.45         |
| Liang                        | 2017 | China      | 12              | T:48.2<br>C:53.9           | T:16/14<br>C:9/19             | 30/28                | T:20/9/1/0<br>C:19/9/1/0                  | T:5.9<br>C:6.9             | T:26.5<br>C:24.1           | T:70.7<br>C:81.0           |
| Peng                         | 2016 | China      | 9               | A:43.9<br>B:40.8<br>C:39.9 | A:17/13<br>B:16/14<br>C:14/16 | A:30<br>B:30<br>C:30 | A:10/15/5/0<br>B:10/13/7/0<br>C:12/13/5/0 | A:11.7<br>B:12.9<br>C:12.1 | A:20.5<br>B:19.8<br>C:21.9 | A:82.4<br>B:78.4<br>C:78.7 |
| Ramachan dran                | 2017 | India      | 24              | T:38.66<br>C:40.80         | T:27/8<br>C:20/15             | 35/35                | NR                                        | T:6.76<br>C:5.44           | T:22.0<br>C:22.3           | T:79.56<br>C:80.44         |
| Xu                           | 2013 | China      | 18              | T:56.3<br>C:57.8           | T:31/17<br>C:30/22            | 48/52                | T:9/31/7/1<br>C:5/35/11/7                 | T:5.39<br>C:5.10           | T:18.4<br>C:19.3           | T:77.5<br>C:87.7           |
| <b>TAC vs Control</b>        |      |            |                 |                            |                               |                      |                                           |                            |                            |                            |
| Praga                        | 2007 | Spain      | 30              | T:43.7<br>C:50.1           | T:20/5<br>C:20/3              | 25/23                | T:4/15/3/0<br>C:4/18/1/0                  | T:7.2<br>C:8.4             | T:27<br>C:29               | T:86.6<br>C:97.2           |
| <b>TAC vs CsA</b>            |      |            |                 |                            |                               |                      |                                           |                            |                            |                            |
| Li                           | 2017 | China      | 6               | T:39.4<br>C:42.8           | T:12/4<br>C:13/2              | 16/15                | T:1/11/4/0<br>C:3/11/1/0                  | T:9.5<br>C:9.7             | T:22.8<br>C:23.2           | T:71.8<br>C:73.3           |
| <b>MMF vs Control</b>        |      |            |                 |                            |                               |                      |                                           |                            |                            |                            |
| Dussol                       | 2008 | France     | 12              | T:47.8<br>C:55.9           | T:17/2<br>C:15/2              | 19/17                | T:13/6/0/0<br>C:8/9/0/0                   | T:6.2<br>C:9.5             | T:23.2<br>C:20.2           | T:89.3<br>C:96.4           |
| <b>MMF vs CTX</b>            |      |            |                 |                            |                               |                      |                                           |                            |                            |                            |
| Senthil                      | 2008 | India      | 12              | NR                         | NR                            | 11/10                | NR                                        | NR                         | NR                         | NR                         |
| Fu                           | 2012 | China      | 36              | T:43.1<br>C:42.7           | T:9/4<br>C:8/5                | 13/13                | T:1/4/5/3<br>C:2/3/6/2                    | T:9.57<br>C:9.42           | T:23.4<br>C:23.5           | T:68.8<br>C:66.3           |
| Hayati                       | 2019 | Iran       | 6               | T:38.11<br>C:38.69         | T:10/7<br>C:9/4               | 17/13                | NR                                        | T:5.2<br>C:8.8             | NR                         | NR                         |
| <b>MMF vs Chlorambucil</b>   |      |            |                 |                            |                               |                      |                                           |                            |                            |                            |
| Chan                         | 2007 | China      | 15              | 49.5                       | 13/7                          | 11/9                 | NR                                        | 5.7                        | 26.5                       | 95.1                       |
| <b>MMF vs CsA</b>            |      |            |                 |                            |                               |                      |                                           |                            |                            |                            |
| Choi                         | 2018 | SouthKorea | 11.2            | T:57.7<br>C:52.7           | T:16/5<br>C:9/9               | 21/18                | NR                                        | T:8.9<br>C:8.4             | T:23<br>C:25               | T:97.2<br>C:79.6           |
| <b>CsA vs Steroids</b>       |      |            |                 |                            |                               |                      |                                           |                            |                            |                            |
| Cattran                      | 2001 | Canada     | 18              | T:47<br>C:49               | T:26/2<br>C:16/7              | 28/23                | NR                                        | T:9.7<br>C:8.8             | T:28<br>C:27               | T:114.9<br>C:97.8          |
| <b>CsA vs CTX vs Control</b> |      |            |                 |                            |                               |                      |                                           |                            |                            |                            |
| Kosmadakis                   | 2010 | Greece     | 9               | A:50.5<br>B:55.4           | A:8/2<br>B:4/4                | A:10<br>B:8          | NR                                        | A:6.6<br>B:7.0             | A:27<br>B:28               | NR                         |

|                                 |      |             |              |                  |                    |       |                            |                  |                  |                    |
|---------------------------------|------|-------------|--------------|------------------|--------------------|-------|----------------------------|------------------|------------------|--------------------|
|                                 |      |             |              | C:51.8           | C:5/5              | C:10  |                            | C:5.2            | C:22             |                    |
| <b>CsA vs Control</b>           |      |             |              |                  |                    |       |                            |                  |                  |                    |
| Cattran                         | 1995 | Canada      | 12           | T:44<br>C:40     | T:8/1<br>C:6/2     | 9/8   | NR                         | T:11.5<br>C:12.8 | T:29<br>C:30     | T:186<br>C:204     |
| <b>CTX vs Control</b>           |      |             |              |                  |                    |       |                            |                  |                  |                    |
| Donadio                         | 1974 | USA         | 12           | T:42.6<br>C:45.8 | T:9/2<br>C:8/3     | 11/11 | NR                         | T:7.8<br>C:7.6   | T:27<br>C:23     | T:106.1<br>C:97.2  |
| Jha                             | 2007 | India       | 120          | T:38.0<br>C:37.2 | T:30/17<br>C:27/19 | 47/46 | NR                         | T:6.11<br>C:5.91 | T:23.4<br>C:24.2 | T:107.0<br>C:103.4 |
| Murphy                          | 1992 | Australia   | 24           | T:47<br>C:40     | T:12/7<br>C:14/7   | 19/21 | T:4/14/1/0<br>C:5/15/1/0   | T:5.0<br>C:3.9   | T:28<br>C:30     | T:110<br>C:90      |
| <b>CTX vs Chlorambucil</b>      |      |             |              |                  |                    |       |                            |                  |                  |                    |
| Branten                         | 1998 | Netherlands | T:26<br>C:38 | T:53<br>C:51     | T:15/2<br>C:15/0   | 17/15 | NR                         | T:11<br>C:9      | T:22<br>C:22     | T:274<br>C:219     |
| Ponticeli                       | 1998 | Italy       | 12           | T:48<br>C:50     | T:29/16<br>C:37/13 | 45/50 | No detail                  | T:6.85<br>C:7.96 | NR               | T:91.9<br>C:93.7   |
| Reichert                        | 1994 | Netherlands | 15           | T:49<br>C:45     | T:8/1<br>C:9/0     | 9/9   | NR                         | T:9.8<br>C:8.5   | T:25.9<br>C:22.9 | T:218<br>C:260     |
| <b>Steroids vs Control</b>      |      |             |              |                  |                    |       |                            |                  |                  |                    |
| Cameron                         | 1990 | UK          | 36           | T:45<br>C:44     | T:43/9<br>C:43/8   | 52/51 | NR                         | T:10.8<br>C:10.4 | T:26<br>C:25     | T:114<br>C:115     |
| Cattran                         | 1989 | Canada      | 48           | T:46<br>C:45     | T:61/20<br>C:44/33 | 81/77 | T:6/33/33/9<br>C:7/35/28/7 | T:6.9<br>C:5.2   | T:27<br>C:31     | T:120<br>C:103     |
| Coggins                         | 1979 | USA         | 23           | NR               | T:22/12<br>C:20/18 | 34/38 | T:5/18/9/2<br>C:9/20/8/1   | T:9.4<br>C:8.3   | NR               | T:97.2<br>C:88.4   |
| <b>Chlorambucil vs Steroids</b> |      |             |              |                  |                    |       |                            |                  |                  |                    |
| Ponticeli                       | 1992 | Italy       | 48           | T:46<br>C:47     | T:32/13<br>C:27/20 | 45/47 | No detail                  | T:7.6<br>C:7.0   | NR               | T:88.4<br>C:88.4   |
| <b>Chlorambucil vs Control</b>  |      |             |              |                  |                    |       |                            |                  |                  |                    |
| Ponticeli                       | 1995 | Italy       | 120          | T:43.5<br>C:42   | T:34/8<br>C:29/10  | 42/39 | T:11/21/8/2<br>C:7/23/7/2  | T:6.2<br>C:5.3   | NR               | T:93.8<br>C:93.1   |
| Ponticeli                       | 1984 | Italy       | T:31<br>C:37 | T:42.6<br>C:44.9 | T:26/6<br>C:22/8   | 32/30 | T:10/16/4/2<br>C:7/16/6/1  | NR               | NR               | T:93.7<br>C:95.5   |
| Ponticeli                       | 1983 | Italy       | T:28<br>C:32 | T:39.4<br>C:45.4 | T:18/3<br>C:19/5   | 21/24 | NR                         | NR               | NR               | T:93.4<br>C:97.2   |
| <b>Rituximab vs Control</b>     |      |             |              |                  |                    |       |                            |                  |                  |                    |
| Dahan                           | 2016 | France      | 17           | T:53<br>C:58     | T:28/9<br>C:24/14  | 37/38 | NR                         | NR               | T:22<br>C:22     | T:98.1<br>C:91.1   |
| <b>Rituximab vs CSA</b>         |      |             |              |                  |                    |       |                            |                  |                  |                    |
| Fervenza                        | 2019 | USA         | 24           | T:51.9<br>C:52.2 | T:47/18<br>C:53/12 | 65/65 | NR                         | T:8.9<br>C:8.9   | T:25<br>C:25     | T:115<br>C:115     |
| <b>Rituximab vs CTX</b>         |      |             |              |                  |                    |       |                            |                  |                  |                    |
| Fernández-Juárez G              | 2021 | Spain       | 24           | T:55.2<br>C:56.2 | T:31/12<br>C:24/19 | 43/43 | NR                         | T:6.7<br>C:4.8   | T:26<br>C:26     | T:88.4<br>C:88.4   |
| Scolari                         | 2021 | Italy       | 24           | T:54<br>C:55     | T:28/9<br>C:25/12  | 37/37 | T:4/25/7/1<br>C:8/16/8/2   | T:6<br>C:6       | T:20<br>C:20     | T:88.4<br>C:88.4   |
