# Supplementary material for: Immunosuppressive treatment for idiopathic membranous nephropathy: An updated network meta-analysis
Source: PubMed Central journal article supplement (PMC9835199; doi:10.1515/biol-2022-0527), 2023-01-10
Supplement: SupTable_4.Characteristics_of_patients_in_the_RCTs.pdf [file SupTable_4.Characteristics_of_patients_in_the_RCTs.pdf]

*Supplementary Table 4.Characteristics of patients in the RCTs*

| First author      | Year | Study design         | Intervention                                                                                                                                                                                                                                                                                                                                                                                        |                                                                                                                                                                                                                                                         | PR/CR | Adverse Events | Notes |
|-------------------|------|----------------------|-----------------------------------------------------------------------------------------------------------------------------------------------------------------------------------------------------------------------------------------------------------------------------------------------------------------------------------------------------------------------------------------------------|---------------------------------------------------------------------------------------------------------------------------------------------------------------------------------------------------------------------------------------------------------|-------|----------------|-------|
|                   |      |                      | T-Group                                                                                                                                                                                                                                                                                                                                                                                             | C-Group                                                                                                                                                                                                                                                 | Y/N   | Y/N            |       |
| <b>TAC vs CTX</b> |      |                      |                                                                                                                                                                                                                                                                                                                                                                                                     |                                                                                                                                                                                                                                                         |       |                |       |
| Chen              | 2010 | MC/NB/no placebo/RCT | <p><b>TAC</b> (the initial dosage was 0.1 mg/kg/d,q12h.Later doses were adjusted to achieve a whole-blood 12 hours trough level of 5-10 ng/mL in the first 6 months and 2-5 ng/mL in the next 3 months)</p> <p><b>Prednisone</b>(1mg/kg/d for 4 weeks, tapered gradually, and discontinued by 8 months).</p>                                                                                        | <p><b>CTX</b> (100 mg/d oral daily for 4 months. Dosage was reduced by 50 mg/d if the total white blood cell count fell below 4000/L)</p> <p><b>Prednisone</b> (1mg/kg/d for 4 weeks, tapered gradually, and discontinued by 8 months).</p>             | Y     | Y              | None  |
| He                | 2013 | SC/NB/no placebo/RCT | <p><b>TAC</b>(initial dosage was 1 mg/d for 1 week. Later an alternative dosage of 1 mg one day and 2 mg the other was used. The dosage of 2 mg was divided into 2 equal doses at 12-hour intervals. Dosage was titrated according to a whole blood concentration, with a target of 2-4 ng/mL)</p> <p><b>Prednisone</b> (1mg/kg/d for 4 weeks, 5 mg per 2 weeks down to a dosage of 30 mg/day).</p> | <p><b>CTX</b> (dosage was 750 mg/m<sup>2</sup> body surface, intravenous once every 4 weeks for 24 weeks)</p> <p><b>Prednisone</b> (1mg/kg/d for 4 weeks, by 5 mg per 2 weeks down to a dosage of 30 mg/day).</p>                                       | Y     | Y              | None  |
| Liang             | 2017 | SC/NB/no placebo/RCT | <p><b>TAC</b> (initial dosage was 0.05-0.1mg/kg/d,q12h. Later doses were adjusted to achieve a whole-blood 12 hours trough level of 5-10 ng/mL in the first 6 months and 2-5ng/mL in the next 3 months. Then, the dose was tapered gradually and discontinued at the end of 12 months)</p>                                                                                                          | <p><b>CTX</b> (dosage was 0.5–0.75 g/m<sup>2</sup> once every month for the initial 6 months and once in every 2–3 months for the later period)</p> <p><b>Prednisone</b> (1mg/kg/d for 4 weeks, by 5 mg per 2 weeks down to a dosage of 30 mg/day).</p> | Y     | Y              | None  |
| Peng              | 2016 | SC/NB/no placebo/RCT | <p>Group A:<br/><b>TAC</b> (initial dosage was 0.05</p>                                                                                                                                                                                                                                                                                                                                             | <p>Group B:<br/><b>CTX</b>(dosage was 0.75 g/m<sup>2</sup></p>                                                                                                                                                                                          | Y     | Y              | None  |

|                       |      |                      |                                                                                                                                                                                                                                                                                        |                                                                                                                                                                                                                                                                                                                       |   |   |                                                                                                       |
|-----------------------|------|----------------------|----------------------------------------------------------------------------------------------------------------------------------------------------------------------------------------------------------------------------------------------------------------------------------------|-----------------------------------------------------------------------------------------------------------------------------------------------------------------------------------------------------------------------------------------------------------------------------------------------------------------------|---|---|-------------------------------------------------------------------------------------------------------|
|                       |      |                      | <p>mg/kg/d,q12h. Later doses were adjusted to achieve a whole-blood 12 hours trough level 4-8 ng/mL in the first 6 months and 2-4ng/mL in the next 3 months)</p> <p><b>Prednisone</b> (0.5mg/kg/d for 8 weeks, then decreased by 5 mg per 2 weeks down to a dosage of 20 mg/day).</p>  | <p>once every month for the initial 6 months and once in every 3 months for the later period)</p> <p><b>Prednisone</b>(1 mg/kg/d for 8 weeks, decreased by 5 mg per 2 weeks down to a dosage of 20 mg/day).</p>                                                                                                       |   |   |                                                                                                       |
|                       |      |                      | <p>Group C:</p> <p><b>MMF</b> (1.5-2.0 g/d in two doses)</p> <p><b>Prednisone</b> (1 mg/kg/d for 8 weeks, decreased by 5 mg per 2 weeks down to a dosage of 20 mg/day).</p>                                                                                                            |                                                                                                                                                                                                                                                                                                                       |   |   |                                                                                                       |
| Ramachandran          | 2017 | SC/NB/no placebo/RCT | <p><b>TAC</b> (initial dosage was 0.1 mg/kg/d,q12h. Later doses were adjusted to achieve a whole-blood 12 hours trough level of 5-10 ng/mL in the first 6 months and 4-8 ng/mL in the next 6 months)</p> <p><b>Prednisone</b> (0.5mg/kg/d for 6 months, then tapered and stopped).</p> | <p>Intravenous <b>methylprednisolone</b> 1 g/day in 100 mL normal saline was administered over 60 min on three consecutive days followed by oral prednisolone at 0.5 mg/kg per day for 27 days in the first, third, and fifth month and oral <b>CTX</b> at 2 mg/kg per day in the second, fourth, and sixth month</p> | Y | Y | All the patients were continued on a maximum tolerable dose of <b>ACEI</b> or <b>ARBs</b> and statins |
| Xu                    | 2013 | SC/NB/no placebo/RCT | <p><b>TAC</b> (initial dosage was 0.1 mg/kg/d,q12h. Later doses was in accordance to the measured serum concentration)</p> <p><b>Prednisone</b> (initial dose was 0.5mg/kg/d , then tapered and stopped).</p>                                                                          | <p><b>CTX</b>(dosage was 0.5-0.75 g/m<sup>2</sup> once every month for the initial 6 months and once every 3 months for the later period)</p> <p><b>Prednisone</b> (initial dose was 1mg/kg/d, then tapered and stopped).</p>                                                                                         | Y | Y | None                                                                                                  |
| <b>TAC vs Control</b> |      |                      |                                                                                                                                                                                                                                                                                        |                                                                                                                                                                                                                                                                                                                       |   |   |                                                                                                       |
| Praga                 | 2007 | SC/NB/no placebo/RCT | <p><b>TAC</b> (initial dosage was 0.05mg/kg/d,q12h. Later doses were adjusted to achieve a whole-blood 12 hours trough level 3-5 ng/mL)</p>                                                                                                                                            | <p>Renin-angiotensin blockers, statins, low-salt and low-protein diet</p>                                                                                                                                                                                                                                             | Y | Y | All the patients were instructed to maintain the same doses of <b>ACEI</b> or <b>ARB</b> that         |

|                       |      |                      |                                                                                                                                                                                                                                                                                                                                                                                   |                                                                                                                                                                                                                                                                                                                                                            |   |   |                                                                                                |
|-----------------------|------|----------------------|-----------------------------------------------------------------------------------------------------------------------------------------------------------------------------------------------------------------------------------------------------------------------------------------------------------------------------------------------------------------------------------|------------------------------------------------------------------------------------------------------------------------------------------------------------------------------------------------------------------------------------------------------------------------------------------------------------------------------------------------------------|---|---|------------------------------------------------------------------------------------------------|
|                       |      |                      |                                                                                                                                                                                                                                                                                                                                                                                   |                                                                                                                                                                                                                                                                                                                                                            |   |   | they were taking at randomization until the end of the study                                   |
| <b>TAC vs CsA</b>     |      |                      |                                                                                                                                                                                                                                                                                                                                                                                   |                                                                                                                                                                                                                                                                                                                                                            |   |   |                                                                                                |
| Li                    | 2017 | SC/NB/no placebo/RCT | <p><b>TAC</b> (initial dosage was 0.05-0.1 mg/kg/d,q12h. Later doses were adjusted to achieve a whole-blood 12 hours trough level 5-10 ng/mL)</p> <p><b>Prednisone</b> (initial dosage was 0.5 mg/ kg/d. Then the dosage was tapered slowly by 5 mg per month down to a dosage of 10 mg/d and maintained that dosage throughout the remainder of the 6-month therapy period).</p> | <p><b>CsA</b> (initial dose was 3-5 mg/kg, and the dosage was adjusted to maintain a 100-200 ng/mL trough blood level)</p> <p><b>Prednisone</b> (initial dosage was 0.5 mg/ kg/d. Then the dosage was tapered slowly by 5 mg per month down to a dosage of 10 mg/d and maintained that dosage throughout the remainder of the 6-month therapy period).</p> | Y | Y | None                                                                                           |
| <b>MMF vs Control</b> |      |                      |                                                                                                                                                                                                                                                                                                                                                                                   |                                                                                                                                                                                                                                                                                                                                                            |   |   |                                                                                                |
| Dussol                | 2008 | MC/NB/no placebo/RCT | <p><b>MMF</b> (initial dose was 250 mg/d, progressively increased by 250 mg every other day to 2g/d)</p>                                                                                                                                                                                                                                                                          | <p>Renin-angiotensin blockers, statins, low-salt and low-protein diet, and diuretics in case of edema</p>                                                                                                                                                                                                                                                  | Y | Y | The supportive treatment was also used in the MMF group                                        |
| <b>MMF vs CTX</b>     |      |                      |                                                                                                                                                                                                                                                                                                                                                                                   |                                                                                                                                                                                                                                                                                                                                                            |   |   |                                                                                                |
| Senthil               | 2008 | SC/NB/no placebo/RCT | <p><b>MMF</b> (2.0 g/d in two doses)</p> <p><b>Prednisone</b> (0.5 mg/kg/d for 8-12 weeks,).</p>                                                                                                                                                                                                                                                                                  | <p>Intravenous <b>methylprednisolone</b> 1 g/day in 100 mL for three consecutive days followed by oral prednisolone at 0.5 mg/kg per day for 27 days alternating with oral <b>CTX</b> at 2 mg/kg for 30 days</p>                                                                                                                                           | Y | Y | FSGS patients were also included in this study, so the baseline of the two groups were unclear |
| Fu                    | 2012 | SC/NB/no             | <b>MMF</b> (The initial dose was                                                                                                                                                                                                                                                                                                                                                  | <b>CTX</b> (The dose was 1g once                                                                                                                                                                                                                                                                                                                           | Y | Y | Langue is                                                                                      |

|                            |      |                      |                                                                                                                                                                                                                                                                                                         |                                                                                                                                                                                                                                                                                                                                                                          |   |   |                                                                                                                           |
|----------------------------|------|----------------------|---------------------------------------------------------------------------------------------------------------------------------------------------------------------------------------------------------------------------------------------------------------------------------------------------------|--------------------------------------------------------------------------------------------------------------------------------------------------------------------------------------------------------------------------------------------------------------------------------------------------------------------------------------------------------------------------|---|---|---------------------------------------------------------------------------------------------------------------------------|
|                            |      | placebo/RCT          | 2g/day, then reduced to 1.5g/day after 6 months, 1.0g/day after 18 months, 0.5d/day after 30 months, until the drug is gradually stopped.)<br><b>Prednisone</b> (The initial dose was 1 mg/kg/day once in the morning. After 6-8 weeks, the dose was reduced by 5 mg per week until to 10-20 mg/day.)   | a month. After 6 months of continuous use, it was changed to 1g every 3 months, then stopped after 4-6 times of use.)<br><b>Prednisone</b> (The initial dose was 1 mg/kg/day once in the morning. After 6-8 weeks, the dose was reduced by 5 mg per week until to 10-20 mg/day.)                                                                                         |   |   | Chinese                                                                                                                   |
| Hayati                     | 2019 | SC/DB/no placebo/RCT | <b>MMF</b> (2 g/d in 2 divided doses for 6 months)<br><b>Prednisolone</b> (0.5 mg/kg/d for 2 to 3 months)                                                                                                                                                                                               | A course of alternate months of steroid in the first, third and fifth months and <b>CTX</b> at 1.5 to 2 mg/kg/d in the second, fourth, and sixth months. The steroid months were began with pulse <b>methylprednisolone</b> , 1 g intravenously daily for 3 consecutive days, without oral prednisone and then followed by oral prednisolone at 0.5 mg/kg/d for 27 days. | Y | N | The dose of MMF was decreased to 1.5 or 1 g/d in three or two divided doses among patients with gastrointestinal symptoms |
| <b>MMF vs Chlorambucil</b> |      |                      |                                                                                                                                                                                                                                                                                                         |                                                                                                                                                                                                                                                                                                                                                                          |   |   |                                                                                                                           |
| Chan                       | 2007 | SC/NB/no placebo/RCT | <b>MMF</b> (2.0 g/d in two doses for 6 months)<br><b>Prednisolone</b> was started at 0.8 mg/kg per day p.o., then tapered by 5 mg/day every fortnight until reaching 10 mg/day at around 4 months, then tapered by 2.5 mg/day every fortnight, until total withdrawal at around 6 months from baseline. | <b>Methylprednisolone</b> i.v. 1 g daily for 3 days, followed by prednisolone 0.4 mg/kg per day p.o. for 3 weeks, then 0.2 mg/kg per day till the end of the month.<br>Alternating with <b>chlorambucil</b> at 0.2 mg/kg per day for 1 month, for a total duration of 6 months                                                                                           | Y | Y | The general characteristics of each group was unclear                                                                     |

| MMF vs CsA            |      |                      |                                                                                                                                                                                                                                                                                        |                                                                                                                                                                                                                  |   |   |                                                                                       |
|-----------------------|------|----------------------|----------------------------------------------------------------------------------------------------------------------------------------------------------------------------------------------------------------------------------------------------------------------------------------|------------------------------------------------------------------------------------------------------------------------------------------------------------------------------------------------------------------|---|---|---------------------------------------------------------------------------------------|
| Choi                  | 2018 | MC/NB/no placebo/RCT | <b>MMF</b> (0.5 g twice daily in patients weighing less than 50 kg, or 0.75-1.0g twice daily in patients weighing more than 50 kg)<br><b>Prednisolone</b> (0.15 mg/kg up to a maximum dose of 15 mg/day)                                                                               | <b>CsA</b> (initial dose was 4 mg/kg and the dosage was adjusted to maintain a $100 \pm 50$ ng/mL trough blood level) <b>Prednisolone</b> (0.15 mg/kg up to a maximum dose of 15 mg/day)                         | Y | Y | None                                                                                  |
| CsA vs Steroids       |      |                      |                                                                                                                                                                                                                                                                                        |                                                                                                                                                                                                                  |   |   |                                                                                       |
| Cattran               | 2001 | MC/SB/PC/RCT         | <b>CsA</b> (initial dose was 3.5 mg/kg and the dosage was adjusted to maintain a 125-225 ug/L trough blood level)<br><b>Prednisolone</b> (0.15 mg/kg up to a maximum dose of 15 mg/day. Dosage was reduced after 26 weeks by thirds at 4-week intervals and was stopped after 8 weeks) | <b>Placebo</b> (dosage was 0.035ml /kg/day)<br><b>Prednisolone</b> (0.15 mg/kg up to a maximum dose of 15 mg/day. Dosage was reduced after 26 weeks by thirds at 4-week intervals and was stopped after 8 weeks) | Y | Y | All included patients were steroid-resistant                                          |
| CsA vs CTX vs Control |      |                      |                                                                                                                                                                                                                                                                                        |                                                                                                                                                                                                                  |   |   |                                                                                       |
| Kosmadakis            | 2010 | SC/NB/no placebo/RCT | <b>Cyclosporine</b> (3-3.5 mg/kg/day oral)<br><b>Methylprednisolone</b> (12.5 mg/day oral)                                                                                                                                                                                             | <b>Cyclophosphamide</b> (2 mg/kg/24 hour oral )<br><b>Methylprednisolone</b> (1.5 mg/kg/48 hour oral )                                                                                                           | Y | Y | ACEIs and angiotensin receptor blockers were not prescribed to the other two patients |
|                       |      |                      | Angiotensin-converting enzyme inhibitor (ACEI) <b>Lisinopril</b>                                                                                                                                                                                                                       |                                                                                                                                                                                                                  |   |   |                                                                                       |
| CsA vs Control        |      |                      |                                                                                                                                                                                                                                                                                        |                                                                                                                                                                                                                  |   |   |                                                                                       |
| Cattran               | 1995 | SC/SB/PC/RCT         | <b>CsA</b> (initial dose was 3.5 mg/kg and the dosage was adjusted to maintain a 110-170 ug/L trough blood level)                                                                                                                                                                      | <b>Placebo</b> (dosage was 0.035ml /kg/day)                                                                                                                                                                      | Y | Y | None                                                                                  |
| CTX vs Control        |      |                      |                                                                                                                                                                                                                                                                                        |                                                                                                                                                                                                                  |   |   |                                                                                       |
| Donadio               | 1974 | SC/NB/no placebo/RCT | <b>CTX</b> (1.5 to 2.5 mg/kg/day by oral administration)                                                                                                                                                                                                                               | <b>No drug</b>                                                                                                                                                                                                   | Y | Y | None                                                                                  |
| Jha                   | 2007 | SC/NB/no placebo/RCT | <b>CTX</b> (2mg/kg/day by oral administration in the second,                                                                                                                                                                                                                           | <b>Supportive therapy</b> (dietary sodium restriction, diuretics,                                                                                                                                                | Y | Y | ACEI /ARB were                                                                        |

|        |      |                         |                                                                                                                                                                                                                       |                                                                                                      |   |   |                                                                    |
|--------|------|-------------------------|-----------------------------------------------------------------------------------------------------------------------------------------------------------------------------------------------------------------------|------------------------------------------------------------------------------------------------------|---|---|--------------------------------------------------------------------|
|        |      |                         | fourth, and sixth months);<br>Intravenous<br><b>methylprednisolone</b><br>1 g/d for 3 consecutive days<br>followed by oral<br><b>prednisolone</b> 0.5mg/kg per d<br>for 27 d in the first, third, and<br>fifth months | and antihypertensive agents)                                                                         |   |   | withheld<br>for at least<br>1 yr in both<br>groups.                |
| Murphy | 1992 | SC/NB/no<br>placebo/RCT | <b>CTX</b> (1.5mg/kg/day by oral<br>administration for six<br>months)                                                                                                                                                 | <b>Supportive therapy</b> (dietary<br>sodium restriction, diuretics,<br>and antihypertensive agents) | Y | N | Dipyridam<br>ole and<br>warfarin<br>were used<br>in both<br>groups |

### CTX vs Chlorambucil

|           |      |                         |                                                                                                                                                                                                                                                                                              |                                                                                                                                                                                                                                                                                                       |   |   |                                                                                                           |
|-----------|------|-------------------------|----------------------------------------------------------------------------------------------------------------------------------------------------------------------------------------------------------------------------------------------------------------------------------------------|-------------------------------------------------------------------------------------------------------------------------------------------------------------------------------------------------------------------------------------------------------------------------------------------------------|---|---|-----------------------------------------------------------------------------------------------------------|
| Branten   | 1998 | SC/NB/no<br>placebo/RCT | <b>Methylprednisolone</b> i.v. 1 g<br>daily for 3 days, followed by<br>prednisolone 0.5 mg/kg per<br>day p.o. for 27 days<br><b>Chlorambucil</b> 0.15 mg/kg<br>per day by oral<br>administration for 1 month,<br>for a total<br>duration of 6 months                                         | <b>CTX</b> (1.5-2.0mg/kg/day by<br>oral administration for one<br>year)<br><b>Prednisone</b> 60 mg/day or<br>125 mg every other day by<br>oral administration for at<br>least 8 weeks                                                                                                                 | Y | Y | None                                                                                                      |
| Ponticeli | 1998 | MC/NB/no<br>placebo/RCT | Three cycles of treatment<br>with <b>methylprednisolone</b> (1<br>g given intravenously on 3<br>consecutive days then 0.4<br>mg/kg body weight per day<br>given orally for 27 days),<br>each cycle was followed by 1<br>month of treatment with<br><b>CTX</b> (2.5 mg/kg per day,<br>orally) | Three cycles of treatment<br>with <b>methylprednisolone</b> (1<br>g given intravenously on 3<br>consecutive days then 0.4<br>mg/kg body weight per day<br>given orally for 27 days),<br>each cycle was followed by 1<br>month of treatment with<br><b>chlorambucil</b> (0.2 mg/kg per<br>day, orally) | Y | Y | None                                                                                                      |
| Reichert  | 1994 | SC/NB/no<br>placebo/RCT | Intravenous <b>CTX</b> (750<br>mg/m <sup>2</sup> body surface area<br>once every month for 6<br>months)<br><b>Methylprednisolone</b> (three<br>intravenous 1 g pulses in<br>months 1, 3, and 5).                                                                                             | <b>Chlorambucil</b> (0.15 mg/kg<br>body weight per day orally in<br>months 2, 4, and 6)<br><b>Prednisone</b> (three<br>intravenous pulses of 1 g of<br>methylprednisolone<br>followed by oral prednisone<br>at 0.5 mg/kg per day in<br>months 1, 3, and 5)                                            | Y | Y | The<br>patients<br>with serum<br>creatinine<br>levels<br>lower than<br>150<br>mmol/L<br>were<br>excluded. |

**Steroids vs Control**

|         |      |                      |                                                                                                                                                                                 |                       |   |   |      |
|---------|------|----------------------|---------------------------------------------------------------------------------------------------------------------------------------------------------------------------------|-----------------------|---|---|------|
| Cameron | 1990 | SC/SB/PC/RCT         | <b>Prednisone</b> (125 mg every other day by oral administration for at least 8 weeks, if patients who weighed more than 80 kg, the dosage was 150 mg)                          | <b>Placebo</b>        | Y | Y | None |
| Cattran | 1989 | SC/NB/no placebo/RCT | <b>Prednisone</b> (45 mg per square meter of body-surface area in a single dose on alternate days for six months)                                                               | No specific treatment | Y | Y | None |
| Coggins | 1979 | SC/DB/PC/RCT         | <b>Prednisone</b> (Subjects weighing 45 to 80 kg received 125mg, given as a single dose every other morning. Those weighing less received 100mg and those weighing more, 150mg) | <b>Placebo</b>        | Y | Y | None |

**Chlorambucil vs Steroids**

|           |      |                      |                                                                                                                                                                                                                                                                          |                                                                                                                           |   |   |      |
|-----------|------|----------------------|--------------------------------------------------------------------------------------------------------------------------------------------------------------------------------------------------------------------------------------------------------------------------|---------------------------------------------------------------------------------------------------------------------------|---|---|------|
| Ponticeli | 1992 | MC/NB/no placebo/RCT | Three cycles of treatment with <b>methylprednisolone</b> (1 g given intravenously on 3 consecutive days then 0.4mg/kg body weight per day given orally for 27 days), each cycle was followed by 1 month of treatment with <b>chlorambucil</b> (0.2 mg/kg per day,orally) | <b>Methylprednisolone</b> (1 g given intravenously on 3 consecutive days then 0.4mg/kg body weight per day given orally ) | Y | Y | None |
|-----------|------|----------------------|--------------------------------------------------------------------------------------------------------------------------------------------------------------------------------------------------------------------------------------------------------------------------|---------------------------------------------------------------------------------------------------------------------------|---|---|------|

**Chlorambucil vs Control**

|           |      |                      |                                                                                                                                                                                                                                                                          |                     |   |   |      |
|-----------|------|----------------------|--------------------------------------------------------------------------------------------------------------------------------------------------------------------------------------------------------------------------------------------------------------------------|---------------------|---|---|------|
| Ponticeli | 1995 | SC/NB/no placebo/RCT | Three cycles of treatment with <b>methylprednisolone</b> (1 g given intravenously on 3 consecutive days then 0.4mg/kg body weight per day given orally for 27 days), each cycle was followed by 1 month of treatment with <b>chlorambucil</b> (0.2 mg/kg per day,orally) | Symptomatic therapy | Y | Y | None |
|-----------|------|----------------------|--------------------------------------------------------------------------------------------------------------------------------------------------------------------------------------------------------------------------------------------------------------------------|---------------------|---|---|------|

|           |      |                      |                                                                                                                                                                                                                                                                           |                                                                                                |   |   |      |
|-----------|------|----------------------|---------------------------------------------------------------------------------------------------------------------------------------------------------------------------------------------------------------------------------------------------------------------------|------------------------------------------------------------------------------------------------|---|---|------|
| Ponticeli | 1984 | SC/NB/no placebo/RCT | Three cycles of treatment with <b>methylprednisolone</b> (1 g given intravenously on 3 consecutive days then 0.4mg/kg body weight per day given orally for 27 days), each cycle was followed by 1 month of treatment with <b>chlorambucil</b> (0.2 mg/kg per day, orally) | <b>Supportive therapy</b> (dietary sodium restriction, diuretics, and antihypertensive agents) | Y | Y | None |
| Ponticeli | 1983 | MC/NB/no placebo/RCT | Three cycles of treatment with <b>methylprednisolone</b> (1 g given intravenously on 3 consecutive days then 0.4mg/kg body weight per day given orally for 27 days), each cycle was followed by 1 month of treatment with <b>chlorambucil</b> (0.2 mg/kg per day, orally) | <b>Supportive therapy</b>                                                                      | Y | N | None |

#### Rituximab vs Control

|          |      |                      |                                                                                                                                                                                                                                               |                                                                                                                                                                        |   |   |      |
|----------|------|----------------------|-----------------------------------------------------------------------------------------------------------------------------------------------------------------------------------------------------------------------------------------------|------------------------------------------------------------------------------------------------------------------------------------------------------------------------|---|---|------|
| Dahan    | 2016 | MC/NB/no placebo/RCT | <b>Rituximab</b> (Dosage was 375 mg/m <sup>2</sup> by intravenous administration on days 1 and 8 after randomization)<br><b>NIAT</b> (angiotensin–converting enzyme inhibitors and/or angiotensin 2 receptor blockers, diuretics, and statin) | <b>NIAT</b> (angiotensin–converting enzyme inhibitors and/or angiotensin 2 receptor blockers, diuretics, and statin)                                                   | Y | Y | None |
| Fervenza | 2019 | MC/NB/no placebo/RCT | <b>Rituximab</b> (Dosage was 100 mg by intravenous administration on days 1 and 15 after randomization)                                                                                                                                       | <b>CsA</b> (initial dose was 3.5 mg/kg, divided into two equal doses given at 12-hour intervals. The dosage was adjusted to maintain a 125-175ug/L trough blood level) | Y | Y | None |

#### Rituximab vs CTX

|                     |      |                      |                                                                                     |                                                                       |   |   |                               |
|---------------------|------|----------------------|-------------------------------------------------------------------------------------|-----------------------------------------------------------------------|---|---|-------------------------------|
| Fernández -Juárez G | 2019 | MC/NB/no placebo/RCT | Patients received oral <b>TAC</b> (0.05 mg/Kg/day), to reach target blood levels of | Patients received <b>methylprednisolone</b> at months 1, 3 and 5 (1 g | Y | Y | Treatment group is TAC-rituxi |
|---------------------|------|----------------------|-------------------------------------------------------------------------------------|-----------------------------------------------------------------------|---|---|-------------------------------|



|         |      |                      |                                                                                                                                                                                                                          |                                                                                                                                                                                                                                                                                                                                                                                                                                                  |   |   |      |
|---------|------|----------------------|--------------------------------------------------------------------------------------------------------------------------------------------------------------------------------------------------------------------------|--------------------------------------------------------------------------------------------------------------------------------------------------------------------------------------------------------------------------------------------------------------------------------------------------------------------------------------------------------------------------------------------------------------------------------------------------|---|---|------|
|         |      |                      | 5–7 ng/mL, for six months. At day 180, patients received intravenous <b>rituximab</b> (1 g) and <b>TAC</b> dosage was reduced by 25% per month, with complete withdrawal at the end of month 9                           | intravenously at days 1, 2, 3, then 0.5 mg/Kg/day orally from day 4 to 30). At months 2, 4 and 6, patients received oral <b>CTX</b> adjusted for age and renal function (1.0–2.0 mg/Kg/day for 30 days)                                                                                                                                                                                                                                          |   |   | mab  |
| Scolari | 2021 | MC/NB/no placebo/RCT | Patients received <b>rituximab</b> at a dose of 1 g on days 1 and 15, without concomitant or subsequent drug therapies. <b>Methylprednisolone</b> (2 mg/kg infused in 30 intravenous diluted in 100 mL of normal saline) | The first month of each 2-month cycle (months 1, 3 and 5) began with a 1 g pulse of iv. <b>Methylprednisolone</b> , repeated daily for three consecutive days followed by oral methylprednisolone (0.4 mg/kg/day) or prednisone (0.5 mg/kg/day) for the remaining days of that month. In the second month of each 2-month cycle (months 2, 4 and 6), the steroid was stopped and oral <b>CTX</b> (2.0 mg/kg/day) was given daily for that month. | Y | Y | None |

*\*Note: MC: Multi centre, SC: Single centre, DB: Double blinded, SB: Single blinded, NB: Non-blinded, PC: Placebo controlled, RCT: Randomized controlled trial.*
