# Supplementary material for: Immunosuppressive treatment for idiopathic membranous nephropathy: An updated network meta-analysis
Source: PubMed Central journal article supplement (PMC9835199; doi:10.1515/biol-2022-0527), 2023-01-10
Supplement: SupTable_5.Support_for_judgement_about_risk_of_bias.pdf [file SupTable_5.Support_for_judgement_about_risk_of_bias.pdf]

*Supplementary Table 5. Support for judgement about risk of bias of included studies*

01. Donadio 1974

| Bias                                                      | Authors' judgement | Support for judgement                                                                                                                                                          |
|-----------------------------------------------------------|--------------------|--------------------------------------------------------------------------------------------------------------------------------------------------------------------------------|
| Random sequence generation (selection bias)               | Low risk           | Randomization was performed by using a table of random numbers.                                                                                                                |
| Allocation concealment (selection bias)                   | Low risk           | The table was maintained by the renal pathologist, and was not seen by the clinicians.                                                                                         |
| Blinding of participants and personnel (performance bias) | Low risk           | Although participants and personnel were not blinded to the remission and other outcomes such as 24 hours urinary total protein were unlikely influenced by performance bias   |
| Blinding of outcome assessment (detection bias)           | Low risk           | remission and other outcomes such as 24 hours urinary total protein were unlikely influenced by performance bias                                                               |
| Incomplete outcome data (attrition bias)                  | Low risk           | Analysis was by intention-to-treat principle, details were showed on page 433-436                                                                                              |
| Selective reporting (reporting bias)                      | Low risk           | Trial protocol was not found but predetermined outcomes in methods section were all reported                                                                                   |
| Other bias                                                | Low risk           | This investigation was supported by a grant from the Mayo Foundation and by Public Health Service grant RR-585 from the National Institutes of Health Clinical Research Center |

## 02. Coggins 1979

| Bias                                                      | Authors' judgement | Support for judgement                                                                        |
|-----------------------------------------------------------|--------------------|----------------------------------------------------------------------------------------------|
| Random sequence generation (selection bias)               | Unclear risk       | This is a random study, however the details about randomization are unknown                  |
| Allocation concealment (selection bias)                   | Unclear risk       | This information is not clear from the study                                                 |
| Blinding of participants and personnel (performance bias) | Low risk           | This is a double-blind study, remission and other outcomes were unlikely influenced          |
| Blinding of outcome assessment (detection bias)           | Low risk           | Remission and other outcomes were not affected since this is a double-blind study            |
| Incomplete outcome data (attrition bias)                  | Low risk           | Analysis was by intention-to-treat principle, details were shown on page 1303-1305           |
| Selective reporting (reporting bias)                      | Low risk           | Trial protocol was not found but predetermined outcomes in methods section were all reported |
| Other bias                                                | Unclear risk       | This information is not clear from the study                                                 |

## 03. Ponticelli 1983

| Bias                                        | Authors' judgement | Support for judgement                                                                                                                                                                                                           |
|---------------------------------------------|--------------------|---------------------------------------------------------------------------------------------------------------------------------------------------------------------------------------------------------------------------------|
| Random sequence generation (selection bias) | Low risk           | patients with membranous nephropathy and nephrotic syndrome were admitted to the study and then they were randomly allocated treatment or not through a sealed envelope system using a single randomisation list in our centre. |
| Allocation concealment (selection bias)     | Low risk           | patients with membranous nephropathy and nephrotic syndrome were admitted to the study and then they were randomly allocated treatment or not through a sealed envelope system using a single randomisation list in our centre. |

|                                                           |              |                                                                                                                                          |
|-----------------------------------------------------------|--------------|------------------------------------------------------------------------------------------------------------------------------------------|
| Blinding of participants and personnel (performance bias) | Low risk     | Although participants and personnel were not blinded to the intervention received, remission was unlikely influenced by performance bias |
| Blinding of outcome assessment (detection bias)           | Low risk     | Remission was not affected by detection bias                                                                                             |
| Incomplete outcome data (attrition bias)                  | Low risk     | Analysis was by intention-to-treat principle, details were showed                                                                        |
| Selective reporting (reporting bias)                      | Low risk     | Trial protocol was not found but predetermined outcomes in methods section were all reported                                             |
| Other bias                                                | Unclear risk | This information is not clear from the study                                                                                             |

#### 04. Ponticelli 1984

| Bias                                                      | Authors' judgement | Support for judgement                                                                                                                    |
|-----------------------------------------------------------|--------------------|------------------------------------------------------------------------------------------------------------------------------------------|
| Random sequence generation (selection bias)               | Low risk           | The patients were randomly assigned from a table of random numbers.                                                                      |
| Allocation concealment (selection bias)                   | Unclear risk       | This information is not clear from the study                                                                                             |
| Blinding of participants and personnel (performance bias) | Low risk           | Although participants and personnel were not blinded to the intervention received, remission was unlikely influenced by performance bias |
| Blinding of outcome assessment (detection bias)           | Low risk           | Remission was not affected by detection bias                                                                                             |
| Incomplete outcome data (attrition bias)                  | Low risk           | Analysis was by intention-to-treat principle, details were showed on page 947-948                                                        |
| Selective reporting (reporting bias)                      | Low risk           | Trial protocol was not found but predetermined outcomes in methods section were all reported                                             |
| Other bias                                                | Unclear risk       | This information is not clear from the study                                                                                             |

## 05. Cattran 1989

| Bias                                                      | Authors' judgement | Support for judgement                                                                                                                                                 |
|-----------------------------------------------------------|--------------------|-----------------------------------------------------------------------------------------------------------------------------------------------------------------------|
| Random sequence generation (selection bias)               | Low risk           | The patients were assigned by the trial coordinator according to a table of random numbers.                                                                           |
| Allocation concealment (selection bias)                   | Low risk           | Treatment allocation was concealed to investigators by "computer"                                                                                                     |
| Blinding of participants and personnel (performance bias) | Low risk           | Although participants and personnel were not blinded to the intervention received, remission and renal survival outcomes were unlikely influenced by performance bias |
| Blinding of outcome assessment (detection bias)           | Low risk           | Remission and renal survival outcomes were not affected by detection bias                                                                                             |
| Incomplete outcome data (attrition bias)                  | Low risk           | Analysis was by intention-to-treat principle, details were showed on page 211-214                                                                                     |
| Selective reporting (reporting bias)                      | Low risk           | Trial protocol was not found but predetermined outcomes in methods section were all reported                                                                          |
| Other bias                                                | Unclear risk       | This information is not clear from the study                                                                                                                          |

## 06.Cameron 1990

| Bias                                                      | Authors' judgement | Support for judgement                                                                                                                                                               |
|-----------------------------------------------------------|--------------------|-------------------------------------------------------------------------------------------------------------------------------------------------------------------------------------|
| Random sequence generation (selection bias)               | Low risk           | Randomization was performed centrally, and coded tablets given locally from bottles supplied from the co-ordinator                                                                  |
| Allocation concealment (selection bias)                   | Low risk           | Treatment allocation was concealed to investigators by "central random"                                                                                                             |
| Blinding of participants and personnel (performance bias) | Low risk           | Although participants and personnel were not blinded to the intervention received, remission and other outcomes such as renal function were unlikely influenced by performance bias |
| Blinding of outcome assessment (detection bias)           | Low risk           | Remission and other outcomes such as renal function were not affected by detection bias                                                                                             |
| Incomplete outcome data (attrition bias)                  | Low risk           | Analysis was by intention-to-treat principle, details were showed on page 135-146                                                                                                   |
| Selective reporting (reporting bias)                      | Low risk           | Trial protocol was not found but predetermined outcomes in methods section were all reported                                                                                        |
| Other bias                                                | Unclear risk       | This information is not clear from the study                                                                                                                                        |

## 07.Murphy 1992

| Bias                                                      | Authors' judgement | Support for judgement                                                                                                                                                               |
|-----------------------------------------------------------|--------------------|-------------------------------------------------------------------------------------------------------------------------------------------------------------------------------------|
| Random sequence generation (selection bias)               | Low risk           | After consent was obtained, randomization was performed by opening sealed envelopes.                                                                                                |
| Allocation concealment (selection bias)                   | Low risk           | Treatment allocation was concealed to investigators by "sealed envelope"                                                                                                            |
| Blinding of participants and personnel (performance bias) | Low risk           | Although participants and personnel were not blinded to the intervention received, remission and other outcomes such as renal function were unlikely influenced by performance bias |
| Blinding of outcome assessment (detection bias)           | Low risk           | remission and other outcomes were not affected by detection bias                                                                                                                    |
| Incomplete outcome data (attrition bias)                  | High risk          | The details for adverse events were not reported                                                                                                                                    |

|                                      |              |                                                  |
|--------------------------------------|--------------|--------------------------------------------------|
| Selective reporting (reporting bias) | High risk    | The details for adverse events were not reported |
| Other bias                           | Unclear risk | This information is not clear from the study     |

## 08.Ponticelli 1992

| Bias                                                      | Authors' judgement | Support for judgement                                                                                                                                                                               |
|-----------------------------------------------------------|--------------------|-----------------------------------------------------------------------------------------------------------------------------------------------------------------------------------------------------|
| Random sequence generation (selection bias)               | Low risk           | The coordinatiing center assigned the patients consecutively to one of the two treatment regiments in random order.                                                                                 |
| Allocation concealment (selection bias)                   | Low risk           | Treatment allocation was concealed to investigators by "center random"                                                                                                                              |
| Blinding of participants and personnel (performance bias) | Low risk           | Although participants and personnel were not blinded to the intervention received, remission and other outcomes such as 24 hours urinary total protein were unlikely influenced by performance bias |
| Blinding of outcome assessment (detection bias)           | Low risk           | remission and other outcomes such as 24 hours urinary total protein were not affected by detection bias                                                                                             |
| Incomplete outcome data (attrition bias)                  | Low risk           | Analysis was by intention-to-treat principle,details were showed on page 600-602                                                                                                                    |
| Selective reporting (reporting bias)                      | Low risk           | Trial protocol was not found but predetermined outcomes in methods section were all reported                                                                                                        |
| Other bias                                                | Unclear risk       | This information is not clear from the study                                                                                                                                                        |

## 09.Reichert 1994

| Bias                                                      | Authors' judgement | Support for judgement                                                                                                                    |
|-----------------------------------------------------------|--------------------|------------------------------------------------------------------------------------------------------------------------------------------|
| Random sequence generation (selection bias)               | Unclear risk       | This is a random study,however there is no detial about the randomization.                                                               |
| Allocation concealment (selection bias)                   | Unclear risk       | This information is not clear from the study                                                                                             |
| Blinding of participants and personnel (performance bias) | Low risk           | Although participants and personnel were not blinded to the intervention received, remission was unlikely influenced by performance bias |
| Blinding of outcome assessment (detection bias)           | Low risk           | Remission was not affected by detection bias                                                                                             |
| Incomplete outcome data (attrition bias)                  | Low risk           | Analysis was by intention-to-treat principle,details were showed on page 328-331                                                         |
| Selective reporting (reporting bias)                      | Low risk           | Trial protocol was not found but predetermined outcomes in methods section were all reported                                             |
| Other bias                                                | Low risk           | This work was supported by NWO grant 900/716-111 from the Netherlands Foundation of Scientific Research.                                 |

## 10. Cattran 1995

| Bias                                                      | Authors' judgement | Support for judgement                                                                                                                    |
|-----------------------------------------------------------|--------------------|------------------------------------------------------------------------------------------------------------------------------------------|
| Random sequence generation (selection bias)               | Unclear risk       | This is a random study,however there is no detial about the randomization.                                                               |
| Allocation concealment (selection bias)                   | Unclear risk       | This information is not clear from the study                                                                                             |
| Blinding of participants and personnel (performance bias) | Low risk           | This study is single-blind for patients,remission and other outcomes such as renal function were unlikely influenced by performance bias |

|                                                 |              |                                                                                              |
|-------------------------------------------------|--------------|----------------------------------------------------------------------------------------------|
| Blinding of outcome assessment (detection bias) | Low risk     | Remission and other outcomes such as renal function were not affected by detection bias      |
| Incomplete outcome data (attrition bias)        | Low risk     | Analysis was by intention-to-treat principle, details were showed on page 1131-1132          |
| Selective reporting (reporting bias)            | Low risk     | Trial protocol was not found but predetermined outcomes in methods section were all reported |
| Other bias                                      | Unclear risk | This information is not clear from the study                                                 |

## 11. Ponticelli 1995

| Bias                                                      | Authors' judgement | Support for judgement                                                                                                                    |
|-----------------------------------------------------------|--------------------|------------------------------------------------------------------------------------------------------------------------------------------|
| Random sequence generation (selection bias)               | Unclear risk       | This is a random study, however there is no detail about the randomization.                                                              |
| Allocation concealment (selection bias)                   | Unclear risk       | This information is not clear from the study                                                                                             |
| Blinding of participants and personnel (performance bias) | Low risk           | Although participants and personnel were not blinded to the intervention received, remission was unlikely influenced by performance bias |
| Blinding of outcome assessment (detection bias)           | Low risk           | Remission was not affected by detection bias                                                                                             |
| Incomplete outcome data (attrition bias)                  | High risk          | The predetermined outcomes was not shown, we suspect the completeness of the outcome                                                     |
| Selective reporting (reporting bias)                      | High risk          | Trial protocol was not found, we suspect that the outcomes of this study was reported selectively                                        |
| Other bias                                                | Unclear risk       | This information is not clear from the study                                                                                             |



## 12.Branten 1998

| Bias                                                      | Authors' judgement | Support for judgement                                                                                                                                        |
|-----------------------------------------------------------|--------------------|--------------------------------------------------------------------------------------------------------------------------------------------------------------|
| Random sequence generation (selection bias)               | Unclear risk       | This is a random study,however there is no detial about the randomization.                                                                                   |
| Allocation concealment (selection bias)                   | Unclear risk       | This information is not clear from the study                                                                                                                 |
| Blinding of participants and personnel (performance bias) | Low risk           | Although participants and personnel were not blinded to the intervention received, remission and other outcomes were unlikely influenced by performance bias |
| Blinding of outcome assessment (detection bias)           | Low risk           | Remission and other outcomes were not affected by detection bias                                                                                             |
| Incomplete outcome data (attrition bias)                  | Low risk           | Analysis was by intention-to-treat principle,details were showed on page 361-365                                                                             |
| Selective reporting (reporting bias)                      | Low risk           | Trial protocol was not found but predetermined outcomes in methods section were all reported                                                                 |
| Other bias                                                | Unclear risk       | This information is not clear from the study                                                                                                                 |

### 13. Ponticelli 1998

| Bias                                                      | Authors' judgement | Support for judgement                                                                                                                                                                               |
|-----------------------------------------------------------|--------------------|-----------------------------------------------------------------------------------------------------------------------------------------------------------------------------------------------------|
| Random sequence generation (selection bias)               | Low risk           | Patients were assigned consecutively to one of the two treatment regimens, according to a center-stratified random order                                                                            |
| Allocation concealment (selection bias)                   | Low risk           | Treatment allocation was concealed to investigators by "center random"                                                                                                                              |
| Blinding of participants and personnel (performance bias) | Low risk           | Although participants and personnel were not blinded to the intervention received, remission and other outcomes such as 24 hours urinary total protein were unlikely influenced by performance bias |
| Blinding of outcome assessment (detection bias)           | Low risk           | remission and other outcomes such as 24 hours urinary total protein were not affected by detection bias                                                                                             |
| Incomplete outcome data (attrition bias)                  | Unclear risk       | We suspect the completeness of the adverse events                                                                                                                                                   |
| Selective reporting (reporting bias)                      | Unclear risk       | Trial protocol was not found and the adverse events were not complete.                                                                                                                              |
| Other bias                                                | Low risk           | This work was supported in part by a grant from Ospedale Maggiore di Milano.                                                                                                                        |

### 14. Cattran 2001

| Bias                                                      | Authors' judgement | Support for judgement                                                                                                                                                            |
|-----------------------------------------------------------|--------------------|----------------------------------------------------------------------------------------------------------------------------------------------------------------------------------|
| Random sequence generation (selection bias)               | Low risk           | Randomization was performed by the clinical coordinating center from a table of random numbers and was stratified by center in blocks of two to ensure a balance between groups. |
| Allocation concealment (selection bias)                   | Low risk           | Treatment allocation was concealed to investigators by "computer"                                                                                                                |
| Blinding of participants and personnel (performance bias) | Low risk           | This study is single-blind for patients, remission and other outcomes such as renal function were unlikely influenced by performance bias                                        |

|                                                 |          |                                                                                              |
|-------------------------------------------------|----------|----------------------------------------------------------------------------------------------|
| Blinding of outcome assessment (detection bias) | Low risk | Remission and other outcomes such as renal function were not affected by detection bias      |
| Incomplete outcome data (attrition bias)        | Low risk | Analysis was by intention-to-treat principle, details were showed on page 1486-1488          |
| Selective reporting (reporting bias)            | Low risk | Trial protocol was not found but predetermined outcomes in methods section were all reported |
| Other bias                                      | Low risk | The study was supported by the Kidney Foundation of Canada and Novartis Canada               |

## 15.Jha 2007

| Bias                                                      | Authors' judgement | Support for judgement                                                                                                                                        |
|-----------------------------------------------------------|--------------------|--------------------------------------------------------------------------------------------------------------------------------------------------------------|
| Random sequence generation (selection bias)               | Low risk           | Patients were divided into two groups using table of random numbers.                                                                                         |
| Allocation concealment (selection bias)                   | Unclear risk       | This information is not clear from the study                                                                                                                 |
| Blinding of participants and personnel (performance bias) | Low risk           | Although participants and personnel were not blinded to the remission and other outcomes such as renal function were unlikely influenced by performance bias |
| Blinding of outcome assessment (detection bias)           | Low risk           | remission and other outcomes such as renal function were not affected by detection bias                                                                      |
| Incomplete outcome data (attrition bias)                  | Low risk           | Analysis was by intention-to-treat principle, details were showed on page 1900-1902                                                                          |
| Selective reporting (reporting bias)                      | Low risk           | Trial protocol was not found but predetermined outcomes in methods section were all reported                                                                 |
| Other bias                                                | Unclear risk       | This information is not clear from the study                                                                                                                 |

## 16.Praga2007

| Bias                                                      | Authors' judgement | Support for judgement                                                                                                                                                 |
|-----------------------------------------------------------|--------------------|-----------------------------------------------------------------------------------------------------------------------------------------------------------------------|
| Random sequence generation (selection bias)               | Low risk           | Randomization was performed by the clinical coordinating center using a table of random numbers and was stratified by centers                                         |
| Allocation concealment (selection bias)                   | Low risk           | Allocation concealment was performed by enclosing assignments in sequentially numbered, opaque-closed envelopes.                                                      |
| Blinding of participants and personnel (performance bias) | Low risk           | Although participants and personnel were not blinded to the intervention received, remission and renal survival outcomes were unlikely influenced by performance bias |
| Blinding of outcome assessment (detection bias)           | Low risk           | Remission and renal survival outcomes were not affected by detection bias                                                                                             |
| Incomplete outcome data (attrition bias)                  | Low risk           | Analysis was by intention-to-treat principle, details were showed on page 925-927                                                                                     |
| Selective reporting (reporting bias)                      | Low risk           | This clinical trial is registered in The Cochrane Renal Group Registry(CRG100500015).                                                                                 |
| Other bias                                                | Unclear risk       | This information is not clear from the study                                                                                                                          |

## 17.chan2007

| Bias                                                      | Authors' judgement | Support for judgement                                                                                                                                        |
|-----------------------------------------------------------|--------------------|--------------------------------------------------------------------------------------------------------------------------------------------------------------|
| Random sequence generation (selection bias)               | Low risk           | Patients who satisfied the selection criteria were randomized by drawing envelope into either one of two treatment groups                                    |
| Allocation concealment (selection bias)                   | Low risk           | Treatment allocation was concealed to investigators by "drawing envelope"                                                                                    |
| Blinding of participants and personnel (performance bias) | Low risk           | Although participants and personnel were not blinded to the intervention received, remission and other outcomes were unlikely influenced by performance bias |
| Blinding of outcome assessment (detection bias)           | Low risk           | Remission and other outcomes were not affected by detection bias                                                                                             |
| Incomplete outcome data (attrition bias)                  | Low risk           | Analysis was by intention-to-treat principle, details were showed on page 577-580                                                                            |
| Selective reporting (reporting bias)                      | Low risk           | Trial protocol was not found but predetermined outcomes in methods section were all reported                                                                 |
| Other bias                                                | Unclear risk       | This information is not clear from the study                                                                                                                 |

## 18. Dussol 2008

| Bias                                                      | Authors' judgement | Support for judgement                                                                                                                                                 |
|-----------------------------------------------------------|--------------------|-----------------------------------------------------------------------------------------------------------------------------------------------------------------------|
| Random sequence generation (selection bias)               | Low risk           | Randomization was performed by each center through a centralized Internet on-line application provided by the sponsor (minimization method)                           |
| Allocation concealment (selection bias)                   | Low risk           | Treatment allocation was concealed to investigators by "computer"                                                                                                     |
| Blinding of participants and personnel (performance bias) | Low risk           | Although participants and personnel were not blinded to the intervention received, remission and renal survival outcomes were unlikely influenced by performance bias |

|                                                 |              |                                                                                          |
|-------------------------------------------------|--------------|------------------------------------------------------------------------------------------|
| Blinding of outcome assessment (detection bias) | Low risk     | Remission and renal survival outcomes were not affected by detection bias                |
| Incomplete outcome data (attrition bias)        | Low risk     | Analysis was by intention-to-treat principle, details were showed on page 700-702        |
| Selective reporting (reporting bias)            | Low risk     | Trial protocol was published (CRG020800132). Reported protocol' s predetermined outcomes |
| Other bias                                      | Unclear risk | This information is not clear from the study                                             |

## 19.Senthil 2008

| Bias                                                      | Authors' judgement | Support for judgement                                                                                                                                                                                                          |
|-----------------------------------------------------------|--------------------|--------------------------------------------------------------------------------------------------------------------------------------------------------------------------------------------------------------------------------|
| Random sequence generation (selection bias)               | Low risk           | Treatment allocation was on the basis of minimization. Minimization is a valid alternative to randomization, and ensures uniformity between the two groups with respect to the characteristics used in the allocation process. |
| Allocation concealment (selection bias)                   | Unclear risk       | This information is not clear from the study                                                                                                                                                                                   |
| Blinding of participants and personnel (performance bias) | Low risk           | Although participants and personnel were not blinded to the intervention received, remission and mean proteinuria over creatinuria ratio were unlikely influenced by performance bias                                          |
| Blinding of outcome assessment (detection bias)           | Low risk           | Remission and mean proteinuria over creatinuria ratio were not affected by detection bias                                                                                                                                      |
| Incomplete outcome data (attrition bias)                  | High risk          | FSGS patients were also included in this study, so the baseline and some results of the two groups were unclear                                                                                                                |
| Selective reporting (reporting bias)                      | Unclear risk       | Trial protocol was not found and this information is not clear from the study                                                                                                                                                  |
| Other bias                                                | Unclear risk       | This information is not clear from the study                                                                                                                                                                                   |

| Bias                                                      | Authors' judgement | Support for judgement                                                                                                                                                 |
|-----------------------------------------------------------|--------------------|-----------------------------------------------------------------------------------------------------------------------------------------------------------------------|
| Random sequence generation (selection bias)               | Low risk           | Randomization was performed by a clinical coordinating center using a table of random numbers and was stratified by centers.                                          |
| Allocation concealment (selection bias)                   | Low risk           | Allocation concealment was performed by enclosing assignments in sequentially numbered, opaque-closed envelopes                                                       |
| Blinding of participants and personnel (performance bias) | Low risk           | Although participants and personnel were not blinded to the intervention received, remission and renal survival outcomes were unlikely influenced by performance bias |
| Blinding of outcome assessment (detection bias)           | Low risk           | Remission and renal survival outcomes were not affected by detection bias                                                                                             |
| Incomplete outcome data (attrition bias)                  | Low risk           | Analysis was by intention-to-treat principle, details were showed on page 235-236                                                                                     |
| Selective reporting (reporting bias)                      | Low risk           | Trial protocol was not found but predetermined outcomes in methods section were all reported                                                                          |
| Other bias                                                | Unclear risk       | This information is not clear from the study                                                                                                                          |

## 21.Kosmadakis2010

| Bias                                                      | Authors' judgement | Support for judgement                                                                                                                                        |
|-----------------------------------------------------------|--------------------|--------------------------------------------------------------------------------------------------------------------------------------------------------------|
| Random sequence generation (selection bias)               | Unclear risk       | 0This is a random study,however the detials about the randomization were not mentioned                                                                       |
| Allocation concealment (selection bias)                   | Low risk           | The person doing the randomization was blinded, that is, did not have the right to recruit and did not have direct contact with any of the patients.         |
| Blinding of participants and personnel (performance bias) | Low risk           | Although participants and personnel were not blinded to the intervention received, remission and other outcomes were unlikely influenced by performance bias |
| Blinding of outcome assessment (detection bias)           | Low risk           | Remission and renal survival outcomes were not affected by detection bias                                                                                    |
| Incomplete outcome data (attrition bias)                  | Low risk           | Analysis was by intention-to-treat principle,details were showed .                                                                                           |
| Selective reporting (reporting bias)                      | Low risk           | Trial protocol was not found but predetermined outcomes in methods section were all reported                                                                 |
| Other bias                                                | Low risk           | the investigators had no external funding for this study and no reason to be biased for or against a specific substance.                                     |

## 22.Fu 2012

| Bias                                        | Authors' judgement | Support for judgement                                                                 |
|---------------------------------------------|--------------------|---------------------------------------------------------------------------------------|
| Random sequence generation (selection bias) | Unclear risk       | This is a random study,however the detials about the randomization were not mentioned |
| Allocation concealment (selection bias)     | Unclear risk       | This information is not clear from the study                                          |



|                                                           |              |                                                                                                                                                              |
|-----------------------------------------------------------|--------------|--------------------------------------------------------------------------------------------------------------------------------------------------------------|
| Blinding of participants and personnel (performance bias) | Low risk     | Although participants and personnel were not blinded to the remission and other outcomes such as renal function were unlikely influenced by performance bias |
| Blinding of outcome assessment (detection bias)           | Low risk     | remission and other outcomes were not affected by detection bias                                                                                             |
| Incomplete outcome data (attrition bias)                  | Low risk     | Analysis was by intention-to-treat principle, details were showed                                                                                            |
| Selective reporting (reporting bias)                      | Low risk     | Trial protocol was not found but predetermined outcomes in methods section were all reported                                                                 |
| Other bias                                                | Unclear risk | This information is not clear from the study                                                                                                                 |

### 23.Xu 2013

| Bias                                                      | Authors' judgement | Support for judgement                                                                                                                                                                                                                                                              |
|-----------------------------------------------------------|--------------------|------------------------------------------------------------------------------------------------------------------------------------------------------------------------------------------------------------------------------------------------------------------------------------|
| Random sequence generation (selection bias)               | Unclear risk       | This is a random study, however the details about the randomization were not mentioned                                                                                                                                                                                             |
| Allocation concealment (selection bias)                   | Unclear risk       | This information is not clear from the study                                                                                                                                                                                                                                       |
| Blinding of participants and personnel (performance bias) | Low risk           | Although participants and personnel were not blinded to the intervention received, remission and renal survival outcomes were unlikely influenced by performance bias                                                                                                              |
| Blinding of outcome assessment (detection bias)           | Low risk           | Remission and renal survival outcomes were not affected by detection bias                                                                                                                                                                                                          |
| Incomplete outcome data (attrition bias)                  | Low risk           | Analysis was by intention-to-treat principle, details were showed on page 155-159                                                                                                                                                                                                  |
| Selective reporting (reporting bias)                      | Low risk           | Trial protocol was not found but predetermined outcomes in methods section were all reported                                                                                                                                                                                       |
| Other bias                                                | Low risk           | This work was supported by grants from the National Basic Research Program of China 973, grant No. 2012CB517600 (grant No. 2012CB517604), the Research on Hypertensive Nephropathy and Ischemic Kidney Diseases National Key Technology R&D Program (12-5), grant No. 2011BAI10B00 |

---

|  |  |                                                                                                      |
|--|--|------------------------------------------------------------------------------------------------------|
|  |  | (grant No. 2011BAI10B06), and the National Natural Science Foundation of China (grant No. 30871001). |
|--|--|------------------------------------------------------------------------------------------------------|

| Bias                                                      | Authors' judgement | Support for judgement                                                                                                                                                 |
|-----------------------------------------------------------|--------------------|-----------------------------------------------------------------------------------------------------------------------------------------------------------------------|
| Random sequence generation (selection bias)               | Low risk           | The randomization was performed through a preprinted randomization table.                                                                                             |
| Allocation concealment (selection bias)                   | Unclear risk       | This information is not clear from the study                                                                                                                          |
| Blinding of participants and personnel (performance bias) | Low risk           | Although participants and personnel were not blinded to the intervention received, remission and renal survival outcomes were unlikely influenced by performance bias |
| Blinding of outcome assessment (detection bias)           | Low risk           | Remission and renal survival outcomes were not affected by detection bias                                                                                             |
| Incomplete outcome data (attrition bias)                  | Low risk           | Analysis was by intention-to-treat principle, details were showed on page 567-568                                                                                     |
| Selective reporting (reporting bias)                      | Low risk           | Trial protocol was not found but predetermined outcomes in methods section were all reported                                                                          |
| Other bias                                                | Unclear risk       | This information is not clear from the study                                                                                                                          |

## 25.Dahan2016

| Bias                                                      | Authors' judgement | Support for judgement                                                                                                                                                                                                                                                                                                                                                                                                                                                                                          |
|-----------------------------------------------------------|--------------------|----------------------------------------------------------------------------------------------------------------------------------------------------------------------------------------------------------------------------------------------------------------------------------------------------------------------------------------------------------------------------------------------------------------------------------------------------------------------------------------------------------------|
| Random sequence generation (selection bias)               | Unclear risk       | This is a random study, however there is no detail about the randomization.                                                                                                                                                                                                                                                                                                                                                                                                                                    |
| Allocation concealment (selection bias)                   | Unclear risk       | This information is not clear from the study                                                                                                                                                                                                                                                                                                                                                                                                                                                                   |
| Blinding of participants and personnel (performance bias) | Low risk           | Although participants and personnel were not blinded to the intervention received, remission and other outcomes such as PLA2R were unlikely influenced by performance bias                                                                                                                                                                                                                                                                                                                                     |
| Blinding of outcome assessment (detection bias)           | Low risk           | remission and other outcomes such as PLA2R were not affected by detection bias                                                                                                                                                                                                                                                                                                                                                                                                                                 |
| Incomplete outcome data (attrition bias)                  | Low risk           | Analysis was by intention-to-treat principle, details were showed on page 2-5                                                                                                                                                                                                                                                                                                                                                                                                                                  |
| Selective reporting (reporting bias)                      | Low risk           | Trial protocol was published (NCT01508468)). Reported protocol' s predetermined outcomes.                                                                                                                                                                                                                                                                                                                                                                                                                      |
| Other bias                                                | Low risk           | This study was funded by Programme Hospitalier de Recherche Clinique, French Ministry of Health grant AOM10089; European Research Council ERC-2012-ADG_20120314 grant agreement 322947; Agence Nationale pour la Recherche Programme Blanc SVSE1 (2012) Decision grant ANR-12-BSE1-0002-01; Fondation pour la Recherche Médicale Equipe FRM 2012 grant; and 7th Framework Programme of the European Community contract 2012-305608 (European Consortium for High-Throughput Research in Rare Kidney Diseases). |

## 26.Peng 2016

| Bias                                        | Authors' judgement | Support for judgement                                                       |
|---------------------------------------------|--------------------|-----------------------------------------------------------------------------|
| Random sequence generation (selection bias) | Unclear risk       | This is a random study, however there is no detail about the randomization. |

|                                                           |              |                                                                                                                                                                                                                                                                                                                                                                                                                             |
|-----------------------------------------------------------|--------------|-----------------------------------------------------------------------------------------------------------------------------------------------------------------------------------------------------------------------------------------------------------------------------------------------------------------------------------------------------------------------------------------------------------------------------|
| Allocation concealment (selection bias)                   | Unclear risk | This information is not clear from the study                                                                                                                                                                                                                                                                                                                                                                                |
| Blinding of participants and personnel (performance bias) | Low risk     | Although participants and personnel were not blinded to the intervention received, remission was unlikely influenced by performance bias                                                                                                                                                                                                                                                                                    |
| Blinding of outcome assessment (detection bias)           | Low risk     | Remission was not affected by detection bias                                                                                                                                                                                                                                                                                                                                                                                |
| Incomplete outcome data (attrition bias)                  | Low risk     | Analysis was by intention-to-treat principle, details were showed on page 3-5                                                                                                                                                                                                                                                                                                                                               |
| Selective reporting (reporting bias)                      | Low risk     | Trial protocol was not found but predetermined outcomes in methods section were all reported                                                                                                                                                                                                                                                                                                                                |
| Other bias                                                | Low risk     | This study was supported by research grants as follows: 1) National Basic Research Program of China 973 Program (No.2012CB517602); 2) National Natural Science Foundation of China (81370812); 3) Doctoral Program of Ministry of Education of China (20122307110018); 4) Special Grade of China Postdoctoral Science Foundation (No. 201003463); 5) Heilongjiang Postdoctoral Science Research Foundation (No. LBHQ10028). |

## 27.Li 2017

| Bias                                                      | Authors' judgement | Support for judgement                                                                                                                                                                                  |
|-----------------------------------------------------------|--------------------|--------------------------------------------------------------------------------------------------------------------------------------------------------------------------------------------------------|
| Random sequence generation (selection bias)               | Low risk           | Patients were randomized into two groups according to a randomization list generated from the table of random numbers.                                                                                 |
| Allocation concealment (selection bias)                   | Unclear risk       | This information is not clear from the study                                                                                                                                                           |
| Blinding of participants and personnel (performance bias) | Low risk           | Although participants and personnel were not blinded to the remission and other outcomes such as renal function were unlikely influenced by performance bias                                           |
| Blinding of outcome assessment (detection bias)           | Low risk           | Remission and other outcomes such as renal function were not affected by detection bias                                                                                                                |
| Incomplete outcome data (attrition bias)                  | Low risk           | Analysis was by intention-to-treat principle, details were showed on page 9766-9767                                                                                                                    |
| Selective reporting (reporting bias)                      | Low risk           | Trial protocol was not found but predetermined outcomes in methods section were all reported                                                                                                           |
| Other bias                                                | Low risk           | This study was supported by research grants as follows: 1) National Natural Science Foundation of China (81300605); 2) Major Medical Science and Technology Program Plan of Henan Province (201501010) |

28. Ramachandran 2017

| Bias                                                      | Authors' judgement | Support for judgement                                                                                                                                                  |
|-----------------------------------------------------------|--------------------|------------------------------------------------------------------------------------------------------------------------------------------------------------------------|
| Random sequence generation (selection bias)               | Low risk           | Participants were randomly assigned following computer based random numbers to one of the two treatmentgroups.                                                         |
| Allocation concealment (selection bias)                   | Low risk           | Treatment allocation was concealed to investigators by "sequentially labelled sealed envelopes"                                                                        |
| Blinding of participants and personnel (performance bias) | Low risk           | Although participants and personnel were not blinded to the intervention received, remission and reGFR and adverse events were unlikely influenced by performance bias |
| Blinding of outcome assessment (detection bias)           | Low risk           | Remission and eGFR and adverse events were not affected by detection bias                                                                                              |
| Incomplete outcome data (attrition bias)                  | Low risk           | Analysis was by intention-to-treat principle,details were showed on page 140-142                                                                                       |
| Selective reporting (reporting bias)                      | Low risk           | Trial protocol was not found but predetermined outcomes in methods section were all reported                                                                           |
| Other bias                                                | Low risk           | The first author received scientific grant from the Indian Society of Nephrology.                                                                                      |

## 29.Liang2017

| Bias                                                      | Authors' judgement | Support for judgement                                                                                                                                        |
|-----------------------------------------------------------|--------------------|--------------------------------------------------------------------------------------------------------------------------------------------------------------|
| Random sequence generation (selection bias)               | High risk          | Most of the patients were randomly assigned, whereas a few patients had a strong desire to choose the regimen.                                               |
| Allocation concealment (selection bias)                   | High risk          | A few patients chose the regimen independently, it can influence the baseline of the patients in two groups.                                                 |
| Blinding of participants and personnel (performance bias) | Low risk           | Although participants and personnel were not blinded to the intervention received, remission and other outcomes were unlikely influenced by performance bias |
| Blinding of outcome assessment (detection bias)           | Low risk           | Remission and other outcomes were not affected by detection bias                                                                                             |
| Incomplete outcome data (attrition bias)                  | Low risk           | Analysis was by intention-to-treat principle, details were showed on page 514-516                                                                            |
| Selective reporting (reporting bias)                      | Low risk           | Trial protocol was not found but predetermined outcomes in methods section were all reported                                                                 |
| Other bias                                                | Unclear risk       | This information is not clear from the study                                                                                                                 |

## 30.Choi 2018

| Bias                                                      | Authors' judgement | Support for judgement                                                                                                                                        |
|-----------------------------------------------------------|--------------------|--------------------------------------------------------------------------------------------------------------------------------------------------------------|
| Random sequence generation (selection bias)               | Low risk           | All patients were assigned using a block randomization technique, The table of random numbers was generated using the SAS randomization program              |
| Allocation concealment (selection bias)                   | Low risk           | Allocation concealment was done by sealed sequentially numbered opaque envelopes.                                                                            |
| Blinding of participants and personnel (performance bias) | Low risk           | Although participants and personnel were not blinded to the intervention received, remission and other outcomes were unlikely influenced by performance bias |

|                                                 |          |                                                                                                                                                                                                                                                                   |
|-------------------------------------------------|----------|-------------------------------------------------------------------------------------------------------------------------------------------------------------------------------------------------------------------------------------------------------------------|
| Blinding of outcome assessment (detection bias) | Low risk | Remission and other outcomes were not affected by detection bias                                                                                                                                                                                                  |
| Incomplete outcome data (attrition bias)        | Low risk | Analysis was by intention-to-treat principle, details were showed on page 5-9                                                                                                                                                                                     |
| Selective reporting (reporting bias)            | Low risk | Trial protocol was published (NCT01282073). Reported protocol' s predetermined outcomes                                                                                                                                                                           |
| Other bias                                      | Low risk | This work was supported by a grant from the Korea Health Technology R & D Project through the Korea Health Industry Development Institute (KHIDI), funded by the Ministry of Health & Welfare, Republic of Korea (grant number: HC15C1129; HI15C0001; HI13C1232). |

### 31.Hayati2019

| Bias                                                      | Authors' judgement | Support for judgement                                                                                                                                                                                                         |
|-----------------------------------------------------------|--------------------|-------------------------------------------------------------------------------------------------------------------------------------------------------------------------------------------------------------------------------|
| Random sequence generation (selection bias)               | Low risk           | Patients were randomly divided into two groups by randomized blocks                                                                                                                                                           |
| Allocation concealment (selection bias)                   | Unclear risk       | This information is not clear from the study                                                                                                                                                                                  |
| Blinding of participants and personnel (performance bias) | Low risk           | Single blind. the person who evaluated patient don't know the kind of drug                                                                                                                                                    |
| Blinding of outcome assessment (detection bias)           | Low risk           | remission and other outcomes were not affected by detection bias                                                                                                                                                              |
| Incomplete outcome data (attrition bias)                  | Low risk           | Analysis was by intention-to-treat principle, details were showed                                                                                                                                                             |
| Selective reporting (reporting bias)                      | Low risk           | Trial protocol was published (available at <a href="https://irct.ir/trial/29433">https://irct.ir/trial/29433</a> ). Reported protocol' s predetermined outcomes                                                               |
| Other bias                                                | Low risk           | The study was a double-blind, randomized and controlled clinical trial approved by the Research Center of Ahvaz Jundishapur University of Medical Sciences. Our study performed at the outpatient clinic of nephrology in the |



Golestan hospital, Ahvaz, Iran. The drugs (MMF and cyclophosphamide) were provided to the patients free of cost.

### 32.Fervenza2019

| Bias                                                      | Authors' judgement | Support for judgement                                                                                                                                                                                                            |
|-----------------------------------------------------------|--------------------|----------------------------------------------------------------------------------------------------------------------------------------------------------------------------------------------------------------------------------|
| Random sequence generation (selection bias)               | Low risk           | The random-ization schedule was computer-generated                                                                                                                                                                               |
| Allocation concealment (selection bias)                   | Low risk           | The random-ization schedule was computer-generated, stratified according to site, blocked with randomly varied block sizes of two and four, and concealed with the use of a Web-based, locked central randomization system.      |
| Blinding of participants and personnel (performance bias) | Low risk           | outcomes were unlikely influenced by performance bias                                                                                                                                                                            |
| Blinding of outcome assessment (detection bias)           | Low risk           | remission and other outcomes were not affected by detection bias                                                                                                                                                                 |
| Incomplete outcome data (attrition bias)                  | Low risk           | Analysis was by intention-to-treat principle, details were showed                                                                                                                                                                |
| Selective reporting (reporting bias)                      | Low risk           | Trial protocol was published (available at NEJM.org). Reported protocol' s predetermined outcomes                                                                                                                                |
| Other bias                                                | Low risk           | The funders had no role in the trial design or conduct; the collection, management, analysis, or interpretation of the data; or in the preparation or review of the manuscript or the approval of the manuscript for submission. |

### 33.Scolari2021

| Bias                                                      | Authors' judgement | Support for judgement                                                                                                                                                                                                                                                                                                                      |
|-----------------------------------------------------------|--------------------|--------------------------------------------------------------------------------------------------------------------------------------------------------------------------------------------------------------------------------------------------------------------------------------------------------------------------------------------|
| Random sequence generation (selection bias)               | Low risk           | Participants were randomized 1:1 to the intervention or active comparator arm.                                                                                                                                                                                                                                                             |
| Allocation concealment (selection bias)                   | Low risk           | An analyst from a distant site, with no clinical involvement in the trial, generated the randomization lists and kept them concealed.                                                                                                                                                                                                      |
| Blinding of participants and personnel (performance bias) | Low risk           | Although participants and personnel were not blinded to the intervention received, remission and other outcomes were unlikely influenced by performance bias                                                                                                                                                                               |
| Blinding of outcome assessment (detection bias)           | Low risk           | remission and other outcomes were not affected by detection bias                                                                                                                                                                                                                                                                           |
| Incomplete outcome data (attrition bias)                  | Low risk           | Analysis was by intention-to-treat principle, details were showed                                                                                                                                                                                                                                                                          |
| Selective reporting (reporting bias)                      | Low risk           | NCT03018535                                                                                                                                                                                                                                                                                                                                |
| Other bias                                                | Low risk           | The interpretation and conclusions contained herein are those of the researchers. All authors affirm that this manuscript is an honest, accurate, and transparent account of the study being reported; that no important aspects of the study have been omitted; and that any discrepancies from the study as planned have been explained. |

### 34.Fernández-Juárez G.2021

| Bias                                                      | Authors' judgement | Support for judgement                                                                                                                                                                                                |
|-----------------------------------------------------------|--------------------|----------------------------------------------------------------------------------------------------------------------------------------------------------------------------------------------------------------------|
| Random sequence generation (selection bias)               | Low risk           | We used a random number producing algorithm by central computer systems for simple randomization, with an equal allocation ratio (1:1) to intervention with corticosteroid-cyclophosphamide or tacrolimus-rituximab. |
| Allocation concealment (selection bias)                   | Low risk           | The subject numbers were assigned sequentially as each subject entered the study.                                                                                                                                    |
| Blinding of participants and personnel (performance bias) | Low risk           | Although participants and personnel were not blinded to the intervention received, remission and other outcomes were unlikely influenced by performance bias                                                         |

|                                                 |          |                                                                                                                                                                                                                                                                                                                                                                                                                                                                                                                                                                                                                                         |
|-------------------------------------------------|----------|-----------------------------------------------------------------------------------------------------------------------------------------------------------------------------------------------------------------------------------------------------------------------------------------------------------------------------------------------------------------------------------------------------------------------------------------------------------------------------------------------------------------------------------------------------------------------------------------------------------------------------------------|
| Blinding of outcome assessment (detection bias) | Low risk | remission and other outcomes were not affected by detection bias                                                                                                                                                                                                                                                                                                                                                                                                                                                                                                                                                                        |
| Incomplete outcome data (attrition bias)        | Low risk | Analysis was by intention-to-treat principle, details were showed                                                                                                                                                                                                                                                                                                                                                                                                                                                                                                                                                                       |
| Selective reporting (reporting bias)            | Low risk | The trial is registered at ClinicalTrials.gov NCT01955187                                                                                                                                                                                                                                                                                                                                                                                                                                                                                                                                                                               |
| Other bias                                      | Low risk | Acknowledgements. Work in this study was supported by the Instituto de Salud Carlos III / Fondo Europeo de Desarrollo Regional (ISCIII/FEDER) grants PI13/02495 and IC114/00350, Red de Investigación Renal (RedInRen) (RD12/0021/0029), European Renal Association-European Dialysis and Transplant Association (ERA-EDTA), Fundación Renal Iñigo Álvarez de Toledo (FRIAT), and Fundación para la Investigación Biomédica Hospital 12 de Octubre (i+12). Funding agencies had no participation in any of the phases of the study. We thank the trial staff at all participating sites and the patients who participated in the trial. |

---

*Footnotes*
