# Supplementary material for: Immunosuppressive treatment for idiopathic membranous nephropathy: An updated network meta-analysis
Source: PubMed Central journal article supplement (PMC9835199; doi:10.1515/biol-2022-0527), 2023-01-10
Supplement: SupTable_6.Details_of_GRADE_assessment_for_CR.pdf [file SupTable_6.Details_of_GRADE_assessment_for_CR.pdf]

**Supplementary Table 6. Details of GRADE assessment for CR**

| No of studies                                                 | Design                | Risk of bias                         | Quality assessment                    |                         |                       |                              | No of patients     |                  | Effect                    |                                                    | Quality          | Importance |
|---------------------------------------------------------------|-----------------------|--------------------------------------|---------------------------------------|-------------------------|-----------------------|------------------------------|--------------------|------------------|---------------------------|----------------------------------------------------|------------------|------------|
|                                                               |                       |                                      | Inconsistency                         | Indirectness            | Imprecision           | Other considerations         | CR                 | Control          | Relative (95% CI)         | Absolute                                           |                  |            |
| <b>New Outcome</b>                                            |                       |                                      |                                       |                         |                       |                              |                    |                  |                           |                                                    |                  |            |
| 31                                                            | no methodology chosen |                                      |                                       |                         |                       | none                         | 271/965<br>(28.1%) | 217/944<br>(23%) | OR 1.33<br>(1.08 to 1.63) | 54 more per 1000<br>(from 14 more to 97 more)      |                  |            |
|                                                               |                       |                                      |                                       |                         |                       |                              |                    | 20.1%            |                           | 50 more per 1000<br>(from 13 more to 90 more)      |                  |            |
| <b>New Outcome - TAC VS CTX (follow-up mean 14.5 months)</b>  |                       |                                      |                                       |                         |                       |                              |                    |                  |                           |                                                    |                  |            |
| 6                                                             | randomised trials     | no serious risk of bias <sup>1</sup> | serious <sup>2</sup>                  | no serious indirectness | serious <sup>3</sup>  | reporting bias <sup>4</sup>  | 84/210<br>(40%)    | 87/207<br>(42%)  | OR 0.93<br>(0.64 to 1.37) | 18 fewer per 1000<br>(from 103 fewer to 78 more)   | ⊕○○○<br>VERY LOW |            |
|                                                               |                       |                                      |                                       |                         |                       |                              |                    | 35.7%            |                           | 16 fewer per 1000<br>(from 95 fewer to 75 more)    |                  |            |
| <b>New Outcome - TAC VS CON (follow-up mean 30 months)</b>    |                       |                                      |                                       |                         |                       |                              |                    |                  |                           |                                                    |                  |            |
| 1                                                             | randomised trials     | no serious risk of bias              | no serious inconsistency              | no serious indirectness | serious <sup>5</sup>  | reporting bias <sup>6</sup>  | 3/25<br>(12%)      | 5/23<br>(21.7%)  | OR 0.49<br>(0.1 to 2.34)  | 98 fewer per 1000<br>(from 190 fewer to 177 more)  | ⊕⊕○○<br>LOW      |            |
|                                                               |                       |                                      |                                       |                         |                       |                              |                    | 21.7%            |                           | 97 fewer per 1000<br>(from 190 fewer to 176 more)  |                  |            |
| <b>New Outcome - MMF VS CON (follow-up mean 12 months)</b>    |                       |                                      |                                       |                         |                       |                              |                    |                  |                           |                                                    |                  |            |
| 1                                                             | randomised trials     | no serious risk of bias              | no serious inconsistency              | no serious indirectness | serious <sup>7</sup>  | reporting bias <sup>8</sup>  | 1/19<br>(5.3%)     | 2/17<br>(11.8%)  | OR 0.42<br>(0.03 to 5.06) | 65 fewer per 1000<br>(from 114 fewer to 285 more)  | ⊕⊕○○<br>LOW      |            |
|                                                               |                       |                                      |                                       |                         |                       |                              |                    | 11.8%            |                           | 65 fewer per 1000<br>(from 114 fewer to 286 more)  |                  |            |
| <b>New Outcome - MMF VS CTX (follow-up mean 15 75 months)</b> |                       |                                      |                                       |                         |                       |                              |                    |                  |                           |                                                    |                  |            |
| 4                                                             | randomised trials     | no serious risk of bias              | no serious inconsistency <sup>9</sup> | no serious indirectness | serious <sup>10</sup> | none <sup>11</sup>           | 18/71<br>(25.4%)   | 19/66<br>(28.8%) | OR 0.87<br>(0.4 to 1.9)   | 28 fewer per 1000<br>(from 149 fewer to 147 more)  | ⊕⊕⊕○<br>MODERATE |            |
|                                                               |                       |                                      |                                       |                         |                       |                              |                    | 28.3%            |                           | 27 fewer per 1000<br>(from 147 fewer to 146 more)  |                  |            |
| <b>New Outcome - MMF VS CH (follow-up mean 15 months)</b>     |                       |                                      |                                       |                         |                       |                              |                    |                  |                           |                                                    |                  |            |
| 1                                                             | randomised trials     | no serious risk of bias              | no serious inconsistency              | no serious indirectness | serious <sup>12</sup> | reporting bias <sup>13</sup> | 2/11<br>(18.2%)    | 3/9<br>(33.3%)   | OR 0.44<br>(0.06 to 3.51) | 153 fewer per 1000<br>(from 304 fewer to 304 more) | ⊕⊕○○<br>LOW      |            |
|                                                               |                       |                                      |                                       |                         |                       |                              |                    | 33.3%            |                           | 153 fewer per 1000<br>(from 304 fewer to 304 more) |                  |            |
| <b>New Outcome - MMF vs CSA (follow-up mean 11 2 months)</b>  |                       |                                      |                                       |                         |                       |                              |                    |                  |                           |                                                    |                  |            |
| 1                                                             | randomised trials     | no serious risk of                   | no serious inconsistency              | no serious indirectness | serious <sup>14</sup> | reporting bias <sup>15</sup> | 4/21<br>(19%)      | 3/18<br>(16.7%)  | OR 1.18<br>(0.23 to 6.13) | 24 more per 1000<br>(from 123                      | ⊕⊕○○<br>LOW      |            |

|                                                              |                   |                         |                                        |                         |                                      |                              |                |               |                         |                                               |                                               |  |  |
|--------------------------------------------------------------|-------------------|-------------------------|----------------------------------------|-------------------------|--------------------------------------|------------------------------|----------------|---------------|-------------------------|-----------------------------------------------|-----------------------------------------------|--|--|
|                                                              |                   | bias                    |                                        |                         |                                      |                              |                |               |                         |                                               | fewer to 384 more)                            |  |  |
|                                                              |                   |                         |                                        |                         |                                      |                              |                | 16.7%         |                         |                                               | 24 more per 1000 (from 123 fewer to 384 more) |  |  |
| <b>New Outcome - CSA VS STE (follow-up mean 18 months)</b>   |                   |                         |                                        |                         |                                      |                              |                |               |                         |                                               |                                               |  |  |
| 1                                                            | randomised trials | no serious risk of bias | no serious inconsistency               | no serious indirectness | serious <sup>16</sup>                | reporting bias <sup>17</sup> | 2/28 (7.1%)    | 1/23 (4.3%)   | OR 1.69 (0.14 to 19.94) | 28 more per 1000 (from 37 fewer to 432 more)  | ⊕⊕○○ LOW                                      |  |  |
|                                                              |                   |                         |                                        |                         |                                      |                              |                | 4.4%          |                         | 28 more per 1000 (from 38 fewer to 435 more)  |                                               |  |  |
| <b>New Outcome - CTX VS CON (follow-up mean 52 months)</b>   |                   |                         |                                        |                         |                                      |                              |                |               |                         |                                               |                                               |  |  |
| 3                                                            | randomised trials | no serious risk of bias | no serious inconsistency <sup>18</sup> | no serious indirectness | serious <sup>19</sup>                | reporting bias <sup>20</sup> | 6/38 (15.8%)   | 1/42 (2.4%)   | OR 6.26 (1.02 to 38.45) | 109 more per 1000 (from 0 more to 460 more)   | ⊕⊕○○ LOW                                      |  |  |
|                                                              |                   |                         |                                        |                         |                                      |                              |                | 0%            |                         | -                                             |                                               |  |  |
| <b>New Outcome - CTX VS CH (follow-up mean 22.75 months)</b> |                   |                         |                                        |                         |                                      |                              |                |               |                         |                                               |                                               |  |  |
| 3                                                            | randomised trials | no serious risk of bias | no serious inconsistency <sup>21</sup> | no serious indirectness | serious <sup>22</sup>                | none <sup>23</sup>           | 23/69 (33.3%)  | 13/68 (19.1%) | OR 2.14 (0.98 to 4.7)   | 145 more per 1000 (from 3 fewer to 335 more)  | ⊕⊕○○ MODERATE                                 |  |  |
|                                                              |                   |                         |                                        |                         |                                      |                              |                | 11.1%         |                         | 100 more per 1000 (from 2 fewer to 259 more)  |                                               |  |  |
| <b>New Outcome - STE vs CON (follow-up mean 35.5 months)</b> |                   |                         |                                        |                         |                                      |                              |                |               |                         |                                               |                                               |  |  |
| 2                                                            | randomised trials | no serious risk of bias | no serious inconsistency <sup>24</sup> | no serious indirectness | serious <sup>25</sup>                | reporting bias <sup>26</sup> | 20/115 (17.4%) | 23/115 (20%)  | OR 0.82 (0.42 to 1.6)   | 30 fewer per 1000 (from 105 fewer to 86 more) | ⊕⊕○○ LOW                                      |  |  |
|                                                              |                   |                         |                                        |                         |                                      |                              |                | 17.6%         |                         | 27 fewer per 1000 (from 94 fewer to 79 more)  |                                               |  |  |
| <b>New Outcome - CH vs STE (follow-up mean 48 months)</b>    |                   |                         |                                        |                         |                                      |                              |                |               |                         |                                               |                                               |  |  |
| 1                                                            | randomised trials | no serious risk of bias | no serious inconsistency               | no serious indirectness | serious <sup>27</sup>                | reporting bias <sup>28</sup> | 14/45 (31.1%)  | 10/47 (21.3%) | OR 1.67 (0.65 to 4.28)  | 98 more per 1000 (from 63 fewer to 324 more)  | ⊕⊕○○ LOW                                      |  |  |
|                                                              |                   |                         |                                        |                         |                                      |                              |                | 21.3%         |                         | 98 more per 1000 (from 63 fewer to 324 more)  |                                               |  |  |
| <b>New Outcome - CH vs CON (follow-up mean 49.6 months)</b>  |                   |                         |                                        |                         |                                      |                              |                |               |                         |                                               |                                               |  |  |
| 3                                                            | randomised trials | no serious risk of bias | no serious inconsistency <sup>29</sup> | no serious indirectness | no serious imprecision <sup>30</sup> | none <sup>31</sup>           | 38/95 (40%)    | 7/93 (7.5%)   | OR 8.43 (3.49 to 20.38) | 332 more per 1000 (from 146 more to 549 more) | ⊕⊕⊕⊕ HIGH                                     |  |  |
|                                                              |                   |                         |                                        |                         |                                      |                              |                | 6.7%          |                         | 310 more per 1000 (from 133 more to 527 more) |                                               |  |  |
| <b>New Outcome - RTX vs CON (follow-up mean 17 months)</b>   |                   |                         |                                        |                         |                                      |                              |                |               |                         |                                               |                                               |  |  |
| 1                                                            | randomised trials | no serious risk of bias | no serious inconsistency               | no serious indirectness | serious <sup>32</sup>                | reporting bias <sup>33</sup> | 7/37 (18.9%)   | 1/38 (2.6%)   | OR 8.63 (1.01 to 74.11) | 163 more per 1000 (from 0 more to 641 more)   | ⊕⊕○○ LOW                                      |  |  |

|                                                            |                   |                         |                          |                         |                                      |                              |               |               |                            |            |            |                                                 |               |  |
|------------------------------------------------------------|-------------------|-------------------------|--------------------------|-------------------------|--------------------------------------|------------------------------|---------------|---------------|----------------------------|------------|------------|-------------------------------------------------|---------------|--|
|                                                            |                   |                         |                          |                         |                                      |                              |               |               |                            |            |            | 161 more per 1000 (from 0 more to 638 more)     |               |  |
|                                                            |                   |                         |                          |                         |                                      |                              |               |               |                            |            |            | 2.6%                                            |               |  |
| <b>New Outcome - TAC VS CSA (follow-up mean 6 months)</b>  |                   |                         |                          |                         |                                      |                              |               |               |                            |            |            |                                                 |               |  |
| 1                                                          | randomised trials | no serious risk of bias | no serious inconsistency | no serious indirectness | serious <sup>34</sup>                | reporting bias <sup>35</sup> | 7/16 (43.8%)  | 5/15 (33.3%)  | OR 1.56 (0.36 to 6.69)     |            |            | 105 more per 1000 (from 181 fewer to 437 more)  | ⊕⊕⊕⊕ LOW      |  |
|                                                            |                   |                         |                          |                         |                                      |                              |               |               |                            |            | 33.3%      | 105 more per 1000 (from 181 fewer to 437 more)  |               |  |
| <b>New Outcome - RTX VS CSA (follow-up mean 24 months)</b> |                   |                         |                          |                         |                                      |                              |               |               |                            |            |            |                                                 |               |  |
| 1                                                          | randomised trials | no serious risk of bias | no serious inconsistency | no serious indirectness | no serious imprecision <sup>36</sup> | reporting bias <sup>37</sup> | 23/65 (35.4%) | 0/65 (0%)     | OR 72.44 (4.28 to 1224.53) | -          |            |                                                 | ⊕⊕⊕⊕ MODERATE |  |
|                                                            |                   |                         |                          |                         |                                      |                              |               |               |                            |            | 0%         | -                                               |               |  |
| <b>New Outcome - TAC VS MMF (follow-up mean 9 months)</b>  |                   |                         |                          |                         |                                      |                              |               |               |                            |            |            |                                                 |               |  |
| 1                                                          | randomised trials | no serious risk of bias | no serious inconsistency | no serious indirectness | no serious imprecision <sup>38</sup> | reporting bias <sup>39</sup> | 16/30 (53.3%) | 6/30 (20%)    | not pooled                 | not pooled |            |                                                 | ⊕⊕⊕⊕ MODERATE |  |
|                                                            |                   |                         |                          |                         |                                      |                              |               |               |                            | 0%         | not pooled |                                                 |               |  |
| <b>New Outcome - CSA VS CON (follow-up mean 12 months)</b> |                   |                         |                          |                         |                                      |                              |               |               |                            |            |            |                                                 |               |  |
| 1                                                          | randomised trials | no serious risk of bias | no serious inconsistency | no serious indirectness | serious <sup>40</sup>                | reporting bias <sup>41</sup> | 1/10 (10%)    | 0/10 (0%)     | OR 3.32 (0.12 to 91.6)     | -          |            |                                                 | ⊕⊕⊕⊕ LOW      |  |
|                                                            |                   |                         |                          |                         |                                      |                              |               |               |                            |            | 0%         | -                                               |               |  |
| <b>New Outcome - CSA VS CTX (follow-up mean 9 months)</b>  |                   |                         |                          |                         |                                      |                              |               |               |                            |            |            |                                                 |               |  |
| 1                                                          | randomised trials | no serious risk of bias | no serious inconsistency | no serious indirectness | serious <sup>42</sup>                | reporting bias <sup>43</sup> | 1/10 (10%)    | 4/8 (50%)     | OR 0.11 (0.01 to 1.34)     |            |            | 401 fewer per 1000 (from 490 fewer to 73 more)  | ⊕⊕⊕⊕ LOW      |  |
|                                                            |                   |                         |                          |                         |                                      |                              |               |               |                            |            | 50%        | 401 fewer per 1000 (from 490 fewer to 73 more)  |               |  |
| <b>New Outcome - RTX VS CTX (follow-up mean 24 months)</b> |                   |                         |                          |                         |                                      |                              |               |               |                            |            |            |                                                 |               |  |
| 2                                                          | randomised trials | no serious risk of bias | serious <sup>44</sup>    | no serious indirectness | no serious imprecision <sup>45</sup> | none <sup>46</sup>           | 17/80 (21.3%) | 33/80 (41.3%) | OR 0.37 (0.18 to 0.75)     |            |            | 206 fewer per 1000 (from 68 fewer to 300 fewer) | ⊕⊕⊕⊕ MODERATE |  |
|                                                            |                   |                         |                          |                         |                                      |                              |               |               |                            |            | 39.7%      | 201 fewer per 1000 (from 66 fewer to 291 fewer) |               |  |

<sup>1</sup> The study of Liang was not RCT, However the other 5 papers were all RCTs with high quality.

<sup>2</sup> The heterogeneity of the 6 studies was high(I<sup>2</sup>=79%), more important, the results of these papers were different with each other.

<sup>3</sup> The optimal information size(OIS) was 18986 > the total events(417). The outcome is imprecise. (α=0.05; β=0.2; rate of treatment group=0.40; rate of control group=0.42)

<sup>4</sup> Egger's test was used to detect the publication bias, the P value=0.002<0.1, therefore, the publication bias of these studies was significant.

<sup>5</sup> The optimal information size(OIS) was 466 > the total events(48). The outcome is imprecise very seriously. (α=0.05; β=0.2; rate of treatment group=0.120; rate of control group=0.217)

<sup>6</sup> There is only one article with small sample in this study, so we suspect its publication bias seriously.

<sup>7</sup> The optimal information size(OIS) was 580 > the total events(36). The outcome is imprecise very seriously. (α=0.05; β=0.2; rate of treatment group=0.053; rate of control group=0.118)

<sup>8</sup> There is only one article with small sample in this study, so we suspect its publication bias seriously.

<sup>9</sup> The heterogeneity of the 4 studies was low(I<sup>2</sup>=0%), all the outcomes were consistent with each other

<sup>10</sup> The optimal information size(OIS) was 18986 > the total events(277). The outcome is imprecise seriously. (α=0.05; β=0.2; rate of treatment group=0.400; rate of control group=0.420)

<sup>11</sup> Egger's test was used to detect the publication bias, the P value=0.92>0.1, therefore, the publication bias of these studies was not significant

<sup>12</sup> The optimal information size(OIS) was 262 > the total events(20). The outcome is imprecise seriously. (α=0.05; β=0.2; rate of treatment group=0.182; rate of control group=0.333)

<sup>13</sup> There is only one article with small sample in this study, so we suspect its publication bias seriously

<sup>14</sup> The optimal information size(OIS) was 8702 > the total events(39). The outcome is imprecise seriously. (α=0.05; β=0.2; rate of treatment group=0.093; rate of control group=0.209)

<sup>15</sup> There is only one article with small sample in this study, so we suspect its publication bias seriously.

<sup>16</sup> The optimal information size(OIS) was 2152 > the total events(51). The outcome is imprecise seriously. (α=0.05; β=0.2; rate of treatment group=0.071; rate of control group=0.043)

<sup>17</sup> There is only one article with small sample in this study, so we suspect its publication bias seriously

<sup>18</sup> The heterogeneity of the 2 studies was low(I<sup>2</sup>=0%), all the outcomes were consistent with each other.

- 19 The optimal information size(OIS) was 144>the total events(80).The outcome is imprecise seriously.( $\alpha=0.05$ ;  $\beta=0.2$ ; rate of treatment group=0.158; rate of control group=0.024)
- 20 There are only two articles with small sample in this study,so we suspect it's publication bias seriously
- 21 The heterogeneity of the 3 studies was low( $I^2=23.3\%$ ),all the outcomes were consistent with each other.
- 22 The optimal information size(OIS) was 300 >the total events(137).The outcome is imprecise seriously.( $\alpha=0.05$ ;  $\beta=0.2$ ; rate of treatment group=0.333; rate of control group=0.191)
- 23 Egger's test was used to detect the publication bias,the P value=0.644>0.1,therefore,the publication bias of these studies was not significant
- 24 The heterogeneity of the 2 studies was low( $I^2=0\%$ ),all the outcomes were consistent with each other.
- 25 The optimal information size(OIS) was 7060 >the total events(230).The outcome is imprecise seriously.( $\alpha=0.05$ ;  $\beta=0.2$ ; rate of treatment group=0.174; rate of control group=0.200)
- 26 There are only two articles with small sample in this study,so we suspect it's publication bias seriously
- 27 The optimal information size(OIS) was 466 >the total events(48).The outcome is imprecise seriously.( $\alpha=0.05$ ;  $\beta=0.2$ ; rate of treatment group=0.120; rate of control group=0.217)
- 28 There are only two articles with small sample in this study,so we suspect it's publication bias seriously
- 29 The heterogeneity of the 3 studies was low( $I^2=0\%$ ),all the outcomes were consistent with each other.
- 30 The optimal information size(OIS) was 52 <the total events(188).and the 95%CI excluded no effect,The outcome is precise.( $\alpha=0.05$ ;  $\beta=0.2$ ; rate of treatment group=0.400; rate of control group=0.075)
- 31 Egger's test was used to detect the publication bias,the P value=0.548>0.1,therefore,the publication bias of these studies was not significant.
- 32 The optimal information size(OIS) was 112 >the total events(75).and the 95%CI excluded no effect,The outcome is precise.( $\alpha=0.05$ ;  $\beta=0.2$ ; rate of treatment group=0.189; rate of control group=0.026)
- 33 There is only one article with small sample in this study,so we suspect it's publication bias seriously.
- 34 The optimal information size(OIS) was 674 >the total events(31).The outcome is imprecise seriously.( $\alpha=0.05$ ;  $\beta=0.2$ ; rate of treatment group=0.438; rate of control group=0.333)
- 35 There is only one article with small sample in this study,so we suspect it's publication bias seriously.
- 36 The optimal information size(OIS) was 5<the total events(130).and the 95%CI excluded no effect,The outcome is precise.( $\alpha=0.05$ ;  $\beta=0.2$ ; rate of treatment group=0.354; rate of control group=0.00)
- 37 There is only one article with small sample in this study,so we suspect it's publication bias seriously.
- 38 The optimal information size(OIS) was 60=the total events(60).The outcome is imprecise very seriously.( $\alpha=0.05$ ;  $\beta=0.2$ ; rate of treatment group=0.533; rate of control group=0.200)
- 39 There is only one article with small sample in this study,so we suspect it's publication bias seriously.
- 40 The optimal information size(OIS) was 5382>the total events(277).The outcome is imprecise seriously.( $\alpha=0.05$ ;  $\beta=0.2$ ; rate of treatment group=0.254; rate of control group=0.288)
- 41 There are only two articles with small sample in this study,so we suspect it's publication bias seriously.
- 42 The optimal information size(OIS) was 40 >the total events(18).The outcome is imprecise seriously.( $\alpha=0.05$ ;  $\beta=0.2$ ; rate of treatment group=0.10; rate of control group=0.50)
- 43 There is only one article with small sample in this study,so we suspect it's publication bias seriously.
- 44 The heterogeneity of the 2 studies was high ( $I^2=65\%$ ), the outcomes were not consistent with each other.
- 45 The optimal information size(OIS) was 158 <the total events(160).The outcome is imprecise seriously.( $\alpha=0.05$ ;  $\beta=0.2$ ; rate of treatment group=0.213; rate of control group=0.413)
- 46 Begg's test was used to detect the publication bias,the P value=0.317>0.1,therefore,the publication bias of these studies was not significant.
