# Supplementary material for: Immunosuppressive treatment for idiopathic membranous nephropathy: An updated network meta-analysis
Source: PubMed Central journal article supplement (PMC9835199; doi:10.1515/biol-2022-0527), 2023-01-10
Supplement: SupTable_7.Inconsistency_test_for_CR.pdf [file SupTable_7.Inconsistency_test_for_CR.pdf]

| Side | Direct Coef. | Std. Err. | Indirect Coef. | Std. Err. | Difference Coef. | Std. Err. | P>z   |
|------|--------------|-----------|----------------|-----------|------------------|-----------|-------|
| A B  | -1.55946     | 1.007302  | -0.13077       | 0.655373  | -1.42869         | 1.199264  | 0.234 |
| A C  | -0.44183     | 1.13612   | -1.51601       | 0.829695  | 1.074176         | 1.406827  | 0.445 |
| A D  | -0.0648      | 0.389205  | 1.68094        | 0.896758  | -1.74574         | 0.978833  | 0.075 |
| A H  | 0.711496     | 1.109057  | -1.73469       | 0.634729  | 2.44619          | 1.277845  | 0.056 |
| B C  | -0.16252     | 1.209659  | -0.81309       | 0.874542  | 0.650575         | 1.492682  | 0.663 |
| B D  | 0.126115     | 0.580151  | 1.99393        | 0.803768  | -1.86782         | 0.989047  | 0.059 |
| B F  | 0.81093      | 1.365827  | 0.640981       | 0.729831  | 0.169949         | 1.548592  | 0.913 |
| B H  | 0.875469     | 1.529249  | -0.8701        | 0.687779  | 1.745568         | 1.676795  | 0.298 |
| C D  | 1.924103     | 1.395823  | 1.206928       | 0.73083   | 0.717175         | 1.569996  | 0.648 |
| C E  | -0.52609     | 1.526315  | 0.36292        | 0.97857   | -0.88901         | 1.813074  | 0.624 |
| C G  | 4.282693     | 1.636432  | 0.308557       | 0.881137  | 3.974136         | 1.858578  | 0.032 |
| C H  | -0.79639     | 1.843384  | 0.177824       | 0.812543  | -0.97421         | 2.037054  | 0.632 |
| D F  | -0.82375     | 0.756213  | 0.611826       | 0.737616  | -1.43558         | 1.056438  | 0.174 |
| D G  | -0.89821     | 0.657409  | 2.019839       | 1.127309  | -2.91805         | 1.304703  | 0.025 |
| D H  | -1.39172     | 1.020746  | -1.33117       | 0.605528  | -0.06055         | 1.179941  | 0.959 |
| E F  | 0.513403     | 0.978579  | 1.635164       | 0.834176  | -1.12176         | 1.285872  | 0.383 |
| E H  | 0.11906      | 0.728593  | -0.46524       | 0.976891  | 0.584301         | 1.219743  | 0.632 |
| F H  | -2.09952     | 0.637121  | -0.24838       | 0.695057  | -1.85115         | 0.942908  | 0.05  |
| G H  | -2.15563     | 1.380726  | -0.89604       | 0.855031  | -1.25959         | 1.624033  | 0.438 |
| A B  | -1.55946     | 1.007302  | -0.13077       | 0.655373  | -1.42869         | 1.199264  | 0.234 |

\*Note: A=TAC; B=MMF; C=CSA; D=CTX; E=STE; F=CHL; G=RTX; H=CON.

**Supplementary Table 7** Inconsistency test for CR. If  $p > 0.05$ , there was no inconsistency among these studies, otherwise the inconsistency was present. The results of CR indicated that the  $p$  value of comparison between CSA to RTX was 0.032, and the  $p$  value of comparison between CTX to RTX was 0.025, therefore the inconsistency was significant. The inconsistency of other comparisons for CR was not significant.
