# Supplementary material for: Immunosuppressive treatment for idiopathic membranous nephropathy: An updated network meta-analysis
Source: PubMed Central journal article supplement (PMC9835199; doi:10.1515/biol-2022-0527), 2023-01-10
Supplement: SupTable_8.The_league_table_plot_for_CR.pdf [file SupTable_8.The_league_table_plot_for_CR.pdf]

*Supplementary Table 8. The league table plot for CR*

|                                   |                     |                                   |                                    |                     |                                   |                      |                                   |
|-----------------------------------|---------------------|-----------------------------------|------------------------------------|---------------------|-----------------------------------|----------------------|-----------------------------------|
| <b>TAC</b>                        | 0.58<br>(0.19,1.72) | 0.32<br>(0.09,1.18)               | 1.24<br>(0.60,2.57)                | 0.35<br>(0.08,1.51) | 1.13<br>(0.35,3.72)               | 1.12<br>(0.28,4.45)  | <b>0.32</b><br><b>(0.10,1.00)</b> |
| 1.74<br>(0.58,5.20)               | <b>MMF</b>          | 0.56<br>(0.14,2.19)               | 2.16<br>(0.82,5.65)                | 0.62<br>(0.14,2.80) | 1.97<br>(0.57,6.84)               | 1.94<br>(0.43,8.71)  | 0.56<br>(0.16,1.92)               |
| 3.13<br>(0.85,11.53)              | 1.80<br>(0.46,7.10) | <b>CSA</b>                        | <b>3.89</b><br><b>(1.10,13.75)</b> | 1.11<br>(0.22,5.48) | 3.55<br>(0.80,15.65)              | 3.50<br>(0.70,17.51) | 1.01<br>(0.24,4.21)               |
| 0.81<br>(0.39,1.67)               | 0.46<br>(0.18,1.21) | <b>0.26</b><br><b>(0.07,0.91)</b> | <b>CTX</b>                         | 0.29<br>(0.07,1.11) | 0.91<br>(0.32,2.58)               | 0.90<br>(0.27,3.03)  | <b>0.26</b><br><b>(0.09,0.72)</b> |
| 2.82<br>(0.66,12.00)              | 1.62<br>(0.36,7.38) | 0.90<br>(0.18,4.45)               | 3.50<br>(0.90,13.62)               | <b>STE</b>          | 3.20<br>(0.93,11.02)              | 3.15<br>(0.57,17.51) | 0.91<br>(0.30,2.81)               |
| 0.88<br>(0.27,2.89)               | 0.51<br>(0.15,1.76) | 0.28<br>(0.06,1.24)               | 1.10<br>(0.39,3.09)                | 0.31<br>(0.09,1.08) | <b>CHL</b>                        | 0.99<br>(0.22,4.47)  | <b>0.29</b><br><b>(0.11,0.75)</b> |
| 0.90<br>(0.22,3.56)               | 0.51<br>(0.11,2.31) | 0.29<br>(0.06,1.43)               | 1.11<br>(0.33,3.73)                | 0.32<br>(0.06,1.76) | 1.01<br>(0.22,4.60)               | <b>RTX</b>           | 0.29<br>(0.07,1.22)               |
| <b>3.10</b><br><b>(1.00,9.57)</b> | 1.78<br>(0.52,6.08) | 0.99<br>(0.24,4.12)               | <b>3.84</b><br><b>(1.39,10.62)</b> | 1.10<br>(0.36,3.38) | <b>3.51</b><br><b>(1.34,9.21)</b> | 3.46<br>(0.82,14.56) | <b>CON</b>                        |
