# Supplementary material for: Immunosuppressive treatment for idiopathic membranous nephropathy: An updated network meta-analysis
Source: PubMed Central journal article supplement (PMC9835199; doi:10.1515/biol-2022-0527), 2023-01-10
Supplement: SupTable_9.Details_of_GRADE_assessment_for_TR.pdf [file SupTable_9.Details_of_GRADE_assessment_for_TR.pdf]

Supplementary Table 9. Details of GRADE assessment for TR

| No of studies                                                 | Design                | Risk of bias            | Quality assessment       |                         |                       |                              | Other considerations | No of patients   |                        | Effect                                          |          | Quality | Importance |
|---------------------------------------------------------------|-----------------------|-------------------------|--------------------------|-------------------------|-----------------------|------------------------------|----------------------|------------------|------------------------|-------------------------------------------------|----------|---------|------------|
|                                                               |                       |                         | Inconsistency            | Indirectness            | Imprecision           | PR+CR                        |                      | Control          | Relative (95% CI)      | Absolute                                        |          |         |            |
| <b>New Outcome</b>                                            |                       |                         |                          |                         |                       |                              |                      |                  |                        |                                                 |          |         |            |
| 33                                                            | no methodology chosen |                         |                          |                         |                       | none                         | 626/1022 (61.3%)     | 502/1002 (50.1%) | OR 1.66 (1.13 to 2.44) | 124 more per 1000 (from 31 more to 209 more)    |          |         |            |
|                                                               |                       |                         |                          |                         |                       |                              |                      | 55.6%            |                        | 119 more per 1000 (from 30 more to 197 more)    |          |         |            |
| <b>New Outcome - TAC vs CTX (follow-up mean 14.5 months)</b>  |                       |                         |                          |                         |                       |                              |                      |                  |                        |                                                 |          |         |            |
| 6                                                             | randomised trials     | no serious risk of bias | serious <sup>1</sup>     | no serious indirectness | serious <sup>2</sup>  | none <sup>3</sup>            | 149/210 (71%)        | 154/207 (74.4%)  | OR 1.01 (0.36 to 2.82) | 2 more per 1000 (from 233 fewer to 147 more)    | ⊕⊕○○ LOW |         |            |
|                                                               |                       |                         |                          |                         |                       |                              |                      | 74.2%            |                        | 2 more per 1000 (from 233 fewer to 148 more)    |          |         |            |
| <b>New Outcome - TAC vs CON (follow-up mean 30 months)</b>    |                       |                         |                          |                         |                       |                              |                      |                  |                        |                                                 |          |         |            |
| 1                                                             | randomised trials     | no serious risk of bias | no serious inconsistency | no serious indirectness | serious <sup>4</sup>  | reporting bias <sup>5</sup>  | 10/25 (40%)          | 7/23 (30.4%)     | OR 1.52 (0.46 to 5.04) | 95 more per 1000 (from 137 fewer to 384 more)   | ⊕⊕○○ LOW |         |            |
|                                                               |                       |                         |                          |                         |                       |                              |                      | 30.4%            |                        | 95 more per 1000 (from 137 fewer to 384 more)   |          |         |            |
| <b>New Outcome - MMF vs CON (follow-up mean 12 months)</b>    |                       |                         |                          |                         |                       |                              |                      |                  |                        |                                                 |          |         |            |
| 1                                                             | randomised trials     | no serious risk of bias | no serious inconsistency | no serious indirectness | serious <sup>6</sup>  | reporting bias <sup>7</sup>  | 7/19 (36.8%)         | 7/17 (41.2%)     | OR 0.83 (0.22 to 3.19) | 44 fewer per 1000 (from 278 fewer to 279 more)  | ⊕⊕○○ LOW |         |            |
|                                                               |                       |                         |                          |                         |                       |                              |                      | 41.2%            |                        | 44 fewer per 1000 (from 278 fewer to 279 more)  |          |         |            |
| <b>New Outcome - MMF vs CTX (follow-up mean 15.75 months)</b> |                       |                         |                          |                         |                       |                              |                      |                  |                        |                                                 |          |         |            |
| 4                                                             | randomised trials     | no serious risk of bias | serious <sup>8</sup>     | no serious indirectness | serious <sup>9</sup>  | none <sup>10</sup>           | 47/71 (66.2%)        | 52/66 (78.8%)    | OR 0.59 (0.19 to 1.83) | 101 fewer per 1000 (from 374 fewer to 84 more)  | ⊕⊕○○ LOW |         |            |
|                                                               |                       |                         |                          |                         |                       |                              |                      | 76.7%            |                        | 107 fewer per 1000 (from 382 fewer to 91 more)  |          |         |            |
| <b>New Outcome - MMF vs CH (follow-up mean 15 months)</b>     |                       |                         |                          |                         |                       |                              |                      |                  |                        |                                                 |          |         |            |
| 1                                                             | randomised trials     | no serious risk of bias | no serious inconsistency | no serious indirectness | serious <sup>11</sup> | reporting bias <sup>12</sup> | 5/11 (45.5%)         | 5/9 (55.6%)      | OR 0.67 (0.11 to 3.92) | 100 fewer per 1000 (from 435 fewer to 275 more) | ⊕⊕○○ LOW |         |            |
|                                                               |                       |                         |                          |                         |                       |                              |                      | 55.6%            |                        | 100 fewer per 1000 (from 435 fewer to 275 more) |          |         |            |

|                                                              |                   |                         |                                        |                         |                                      |                              |               |               |                         |                                                |               |  |  |
|--------------------------------------------------------------|-------------------|-------------------------|----------------------------------------|-------------------------|--------------------------------------|------------------------------|---------------|---------------|-------------------------|------------------------------------------------|---------------|--|--|
|                                                              |                   |                         |                                        |                         |                                      |                              |               |               |                         |                                                | 275 more)     |  |  |
| <b>New Outcome - MMF vs CSA (follow-up mean 11.2 months)</b> |                   |                         |                                        |                         |                                      |                              |               |               |                         |                                                |               |  |  |
| 1                                                            | randomised trials | no serious risk of bias | no serious inconsistency               | no serious indirectness | serious <sup>13</sup>                | reporting bias <sup>14</sup> | 16/21 (76.2%) | 12/18 (66.7%) | OR 1.6 (0.39 to 6.51)   | 95 more per 1000 (from 228 fewer to 262 more)  | ⊕⊕⊕⊕ LOW      |  |  |
|                                                              |                   |                         |                                        |                         |                                      |                              |               | 66.7%         |                         | 95 more per 1000 (from 228 fewer to 262 more)  |               |  |  |
| <b>New Outcome - CSA vs STE (follow-up mean 18 months)</b>   |                   |                         |                                        |                         |                                      |                              |               |               |                         |                                                |               |  |  |
| 1                                                            | randomised trials | no serious risk of bias | no serious inconsistency               | no serious indirectness | serious <sup>15</sup>                | reporting bias <sup>16</sup> | 11/28 (39.3%) | 3/23 (13%)    | OR 4.31 (1.03 to 18.04) | 262 more per 1000 (from 3 more to 600 more)    | ⊕⊕⊕⊕ LOW      |  |  |
|                                                              |                   |                         |                                        |                         |                                      |                              |               | 13%           |                         | 262 more per 1000 (from 3 more to 599 more)    |               |  |  |
| <b>New Outcome - CTX vs CON (follow-up mean 52 months)</b>   |                   |                         |                                        |                         |                                      |                              |               |               |                         |                                                |               |  |  |
| 3                                                            | randomised trials | no serious risk of bias | no serious inconsistency <sup>17</sup> | no serious indirectness | no serious imprecision <sup>18</sup> | none <sup>19</sup>           | 54/85 (63.5%) | 32/88 (36.4%) | OR 4.06 (2.01 to 8.19)  | 335 more per 1000 (from 171 more to 460 more)  | ⊕⊕⊕⊕ HIGH     |  |  |
|                                                              |                   |                         |                                        |                         |                                      |                              |               | 26.9%         |                         | 330 more per 1000 (from 156 more to 482 more)  |               |  |  |
| <b>New Outcome - CTX vs CH (follow-up mean 22.75 months)</b> |                   |                         |                                        |                         |                                      |                              |               |               |                         |                                                |               |  |  |
| 3                                                            | randomised trials | no serious risk of bias | serious <sup>20</sup>                  | no serious indirectness | serious <sup>21</sup>                | none <sup>22</sup>           | 54/69 (78.3%) | 42/68 (61.8%) | OR 2.89 (0.63 to 13.27) | 206 more per 1000 (from 113 fewer to 338 more) | ⊕⊕⊕⊕ LOW      |  |  |
|                                                              |                   |                         |                                        |                         |                                      |                              |               | 44.4%         |                         | 254 more per 1000 (from 109 fewer to 470 more) |               |  |  |
| <b>New Outcome - STE vs CON (follow-up mean 35.5 months)</b> |                   |                         |                                        |                         |                                      |                              |               |               |                         |                                                |               |  |  |
| 2                                                            | randomised trials | no serious risk of bias | no serious inconsistency <sup>23</sup> | no serious indirectness | serious <sup>24</sup>                | none <sup>25</sup>           | 19/86 (22.1%) | 11/89 (12.4%) | OR 2.15 (0.94 to 4.94)  | 109 more per 1000 (from 7 fewer to 287 more)   | ⊕⊕⊕⊕ MODERATE |  |  |
|                                                              |                   |                         |                                        |                         |                                      |                              |               | 13.1%         |                         | 114 more per 1000 (from 7 fewer to 296 more)   |               |  |  |
| <b>New Outcome - CH vs STE (follow-up mean 48 months)</b>    |                   |                         |                                        |                         |                                      |                              |               |               |                         |                                                |               |  |  |
| 1                                                            | randomised trials | no serious risk of bias | no serious inconsistency               | no serious indirectness | serious <sup>26</sup>                | reporting bias <sup>27</sup> | 28/45 (62.2%) | 18/47 (38.3%) | OR 2.65 (1.14 to 6.16)  | 239 more per 1000 (from 31 more to 410 more)   | ⊕⊕⊕⊕ LOW      |  |  |
|                                                              |                   |                         |                                        |                         |                                      |                              |               | 38.3%         |                         | 239 more per 1000 (from 31 more to 410 more)   |               |  |  |
| <b>New Outcome - CH vs CON (follow-up mean 49.6 months)</b>  |                   |                         |                                        |                         |                                      |                              |               |               |                         |                                                |               |  |  |
| 3                                                            | randomised trials | no serious risk of bias | no serious inconsistency <sup>28</sup> | no serious indirectness | no serious imprecision <sup>29</sup> | none <sup>30</sup>           | 66/95 (69.5%) | 31/93 (33.3%) | OR 4.65 (2.49 to 8.68)  | 366 more per 1000 (from 221 more to 479 more)  | ⊕⊕⊕⊕ HIGH     |  |  |
|                                                              |                   |                         |                                        |                         |                                      |                              |               |               |                         | 366 more                                       |               |  |  |



- <sup>1</sup> The heterogeneity of the 6 studies was high( $I^2=79\%$ ),more important,the results of these papers were different with each other.
- <sup>2</sup> The optimal information size(OIS) was 5388 >the total events(417).The outcome is imprecise.( $\alpha=0.05$ ;  $\beta=0.2$ ; rate of treatment group=0.710; rate of control group=0.744)
- <sup>3</sup> Egger's test was used to detect the publication bias,the P value=0.13>0.1,therefore,the publication bias of these studies was not significant
- <sup>4</sup> The optimal information size(OIS) was 776 > the total events(48).The outcome is imprecise very seriously.( $\alpha=0.05$ ;  $\beta=0.2$ ; rate of treatment group=0.400; rate of control group=0.304)
- <sup>5</sup> There is only one article with samll sample in this study,so we suspect it's publication bias seriously
- <sup>6</sup> The optimal information size(OIS) was 3856 > the total events(36).The outcome is imprecise very seriously.( $\alpha=0.05$ ;  $\beta=0.2$ ; rate of treatment group=0.368; rate of control group=0.412)
- <sup>7</sup> There is only one article with samll sample in this study,so we suspect it's publication bias seriously
- <sup>8</sup> The heterogeneity of the 4 studies was high( $I^2=37.4\%$ ),more important,the results of these papers were different with each other
- <sup>9</sup> The optimal information size(OIS) was 392 > the total events(137).The outcome is imprecise very seriously.( $\alpha=0.05$ ;  $\beta=0.2$ ; rate of treatment group=0.662; rate of control group=0.788)
- <sup>10</sup> Egger's test was used to detect the publication bias,the P value=0.265>0.1,therefore,the publication bias of these studies was not significant
- <sup>11</sup> The optimal information size(OIS) was 768>the total events(20).The outcome is imprecise seriously.( $\alpha=0.05$ ;  $\beta=0.2$ ; rate of treatment group=0.455; rate of control group=0.556)
- <sup>12</sup> There is only one article with samll sample in this study,so we suspect it's publication bias seriously
- <sup>13</sup> The optimal information size(OIS) was 708>the total events(39).The outcome is imprecise seriously.( $\alpha=0.05$ ;  $\beta=0.2$ ; rate of treatment group=0.762; rate of control group=0.667)
- <sup>14</sup> There is only one article with samll sample in this study,so we suspect it's publication bias seriously
- <sup>15</sup> The optimal information size(OIS) was 86 >the total events(51).The outcome is imprecise very seriously.( $\alpha=0.05$ ;  $\beta=0.2$ ; rate of treatment group=0.393; rate of control group=0.130)
- <sup>16</sup> There is only one article with samll sample in this study,so we suspect it's publication bias seriously
- <sup>17</sup> The heterogeneity of the 3 studies was low( $I^2=0\%$ ),all the outcomes were consistent with each other
- <sup>18</sup> The optimal information size(OIS) was 106 <the total events(173),and the 95%CI excluded no effect,The outcome is precise.( $\alpha=0.05$ ;  $\beta=0.2$ ; rate of treatment group=0.635; rate of control group=0.364)
- <sup>19</sup> Egger's test was used to detect the publication bias,the P value=0.187>0.1,therefore,the publication bias of these studies was not significant
- <sup>20</sup> The heterogeneity of the 3 studies was high( $I^2=58.9\%$ ),more important,the results of these papers were different with each other.
- <sup>21</sup> The optimal information size(OIS) was 240>the total events(137).The outcome is imprecise seriously.( $\alpha=0.05$ ;  $\beta=0.2$ ; rate of treatment group=0.783; rate of control group=0.618)
- <sup>22</sup> Egger's test was used to detect the publication bias,the P value=0.880>0.1,therefore,the publication bias of these studies was not significant
- <sup>23</sup> The heterogeneity of the 2 studies was low( $I^2=0\%$ ),all the outcomes were consistent with each other
- <sup>24</sup> The optimal information size(OIS) was 474>the total events(175).The outcome is imprecise seriously.( $\alpha=0.05$ ;  $\beta=0.2$ ; rate of treatment group=0.221; rate of control group=0.124)
- <sup>25</sup> Begg's test was used to detect the publication bias,the P value=0.317>0.1,therefore,the publication bias of these studies was not significant
- <sup>26</sup> The optimal information size(OIS) was 132>the total events(92).The outcome is imprecise seriously.( $\alpha=0.05$ ;  $\beta=0.2$ ; rate of treatment group=0.622; rate of control group=0.383)
- <sup>27</sup> There is only one article with samll sample in this study,so we suspect it's publication bias seriously
- <sup>28</sup> The heterogeneity of the 4 studies was low( $I^2=0\%$ ),all the outcomes were consistent with each other
- <sup>29</sup> The optimal information size(OIS) was 58 <the total events(188),and the 95%CI excluded no effect,The outcome is precise.( $\alpha=0.05$ ;  $\beta=0.2$ ; rate of treatment group=0.695; rate of control group=0.333)
- <sup>30</sup> Egger's test was used to detect the publication bias,the P value=0.257>0.1,therefore,the publication bias of these studies was not significant.
- <sup>31</sup> The optimal information size(OIS) was 82 >the total events(75),and the 95%CI excluded no effect,The outcome is precise.( $\alpha=0.05$ ;  $\beta=0.2$ ; rate of treatment group=0.645; rate of control group=0.349)
- <sup>32</sup> There is only one article with samll sample in this study,so we suspect it's publication bias seriously
- <sup>33</sup> The optimal information size(OIS) was 244 >the total events(31).The outcome is imprecise seriously.( $\alpha=0.05$ ;  $\beta=0.2$ ; rate of treatment group=0.875; rate of control group=0.733)
- <sup>34</sup> There is only one article with samll sample in this study,so we suspect it's publication bias seriously
- <sup>35</sup> The optimal information size(OIS) was 46<the total events(130),and the 95%CI excluded no effect,The outcome is precise.( $\alpha=0.05$ ;  $\beta=0.2$ ; rate of treatment group=0.600; rate of control group=0.200)
- <sup>36</sup> There is only one article with samll sample in this study,so we suspect it's publication bias seriously
- <sup>37</sup> The optimal information size(OIS) was 316>the total events(60).The outcome is imprecise seriously.( $\alpha=0.05$ ;  $\beta=0.2$ ; rate of treatment group=0.833; rate of control group=0.700)
- <sup>38</sup> There is only one article with samll sample in this study,so we suspect it's publication bias seriously
- <sup>39</sup> The optimal information size(OIS) was 4862>the total events(37).The outcome is imprecise seriously.( $\alpha=0.05$ ;  $\beta=0.2$ ; rate of treatment group=0.526; rate of control group=0.556)
- <sup>40</sup> There are only two articles with samll sample in this study,so we suspect it's publication bias seriously
- <sup>41</sup> The optimal information size(OIS) was 30 >the total events(18).The outcome is imprecise seriously.( $\alpha=0.05$ ;  $\beta=0.2$ ; rate of treatment group=0.600; rate of control group=1.000)
- <sup>42</sup> There is only one article with samll sample in this study,so we suspect it's publication bias seriously
- <sup>43</sup> The heterogeneity of the 3 studies was low( $I^2=0\%$ ),all the outcomes were consistent with each other.
- <sup>44</sup> The optimal information size(OIS) was 486 >the total events(160).The outcome is imprecise seriously.( $\alpha=0.05$ ;  $\beta=0.2$ ; rate of treatment group=0.525; rate of control group=0.650)
- <sup>45</sup> Begg's test was used to detect the publication bias,the P value=0.317>0.1,therefore,the publication bias of these studies was not significant.
