# Supplementary material for: Immunosuppressive treatment for idiopathic membranous nephropathy: An updated network meta-analysis
Source: PubMed Central journal article supplement (PMC9835199; doi:10.1515/biol-2022-0527), 2023-01-10
Supplement: SupTable_10.Inconsistency_test_for_TR.pdf [file SupTable_10.Inconsistency_test_for_TR.pdf]

| Side | Direct Coef. | Std. Err. | Indirect Coef. | Std. Err. | Difference Coef. | Std. Err. | P>z   |
|------|--------------|-----------|----------------|-----------|------------------|-----------|-------|
| A B  | -0.71619     | 0.974732  | -0.64188       | 0.615518  | -0.07432         | 1.155001  | 0.949 |
| A C  | -0.93431     | 1.206271  | -1.11561       | 0.653787  | 0.181302         | 1.372052  | 0.895 |
| A D  | 0.037191     | 0.379335  | 1.085854       | 0.782493  | -1.04866         | 0.866706  | 0.226 |
| A H  | -0.42121     | 0.939407  | -1.56943       | 0.505817  | 1.148215         | 1.066928  | 0.282 |
| B C  | -0.47        | 1.031289  | -0.38361       | 0.716929  | -0.08639         | 1.256003  | 0.945 |
| B D  | 0.525737     | 0.578023  | 1.364528       | 0.657466  | -0.83879         | 0.878146  | 0.339 |
| B F  | 0.405465     | 1.166447  | 0.505904       | 0.603426  | -0.10044         | 1.313286  | 0.939 |
| B H  | 0.182322     | 0.988354  | -0.91283       | 0.550634  | 1.095151         | 1.131389  | 0.333 |
| C D  | 3.14454      | 1.664835  | 1.091932       | 0.554142  | 2.052608         | 1.767209  | 0.245 |
| C E  | -1.4618      | 0.977797  | 0.749022       | 0.741753  | -2.21082         | 1.227308  | 0.072 |
| C G  | 1.791759     | 0.80339   | 0.483121       | 0.752543  | 1.308638         | 1.100798  | 0.235 |
| C H  | 0.113747     | 1.206067  | -0.32715       | 0.597965  | 0.440896         | 1.355902  | 0.745 |
| D F  | -1.07421     | 0.636804  | 0.095731       | 0.550243  | -1.16994         | 0.841513  | 0.164 |
| D G  | -0.57791     | 0.617749  | 0.280558       | 0.723903  | -0.85847         | 0.951574  | 0.367 |
| D H  | -1.14134     | 0.568653  | -1.82889       | 0.47735   | 0.687545         | 0.744048  | 0.355 |
| E F  | 0.975915     | 0.865011  | 0.968736       | 0.717996  | 0.007179         | 1.124171  | 0.995 |
| E H  | -0.75318     | 0.656088  | 0.572125       | 0.7397    | -1.32531         | 0.988555  | 0.18  |
| F H  | -1.60096     | 0.526076  | -0.58818       | 0.5756    | -1.01278         | 0.780368  | 0.194 |
| G H  | -1.26703     | 0.89372   | -1.35663       | 0.63393   | 0.089596         | 1.09572   | 0.935 |

\*Note: A=TAC; B=MMF; C=CSA; D=CTX; E=STE; F=CHL; G=RTX; H=CON.

**Supplementary Table 10** Inconsistency test for TR. If  $p > 0.05$ , there was no inconsistency among these studies, otherwise the inconsistency was present. The results indicated that there was no inconsistency in all comparisons between these groups.
