# Supplementary material for: Immunosuppressive treatment for idiopathic membranous nephropathy: An updated network meta-analysis
Source: PubMed Central journal article supplement (PMC9835199; doi:10.1515/biol-2022-0527), 2023-01-10
Supplement: SupTable_11.The_league_table_plot_for_TR.pdf [file SupTable_11.The_league_table_plot_for_TR.pdf]

*Supplementary Table 11. The league table plot for TR*

|                                   |                                   |                                   |                                    |                                   |                                   |                                    |                                   |
|-----------------------------------|-----------------------------------|-----------------------------------|------------------------------------|-----------------------------------|-----------------------------------|------------------------------------|-----------------------------------|
| <b>TAC</b>                        | 0.52<br>(0.19,1.41)               | 0.34<br>(0.11,1.04)               | 1.26<br>(0.64,2.48)                | 0.32<br>(0.09,1.08)               | 0.84<br>(0.31,2.30)               | 1.02<br>(0.34,3.02)                | <b>0.27</b><br><b>(0.11,0.65)</b> |
| 1.93<br>(0.71,5.24)               | <b>MMF</b>                        | 0.66<br>(0.21,2.05)               | <b>2.44</b><br><b>(1.03,5.74)</b>  | 0.61<br>(0.18,2.15)               | 1.62<br>(0.58,4.57)               | 1.96<br>(0.61,6.29)                | 0.52<br>(0.20,1.34)               |
| 2.93<br>(0.96,8.89)               | 1.52<br>(0.49,4.71)               | <b>CSA</b>                        | <b>3.70</b><br><b>(1.33,10.24)</b> | 0.93<br>(0.28,3.15)               | 2.46<br>(0.77,7.85)               | <b>2.98</b><br><b>(1.00,8.91)</b>  | 0.79<br>(0.28,2.21)               |
| 0.79<br>(0.40,1.56)               | <b>0.41</b><br><b>(0.17,0.97)</b> | <b>0.27</b><br><b>(0.10,0.75)</b> | <b>CTX</b>                         | <b>0.25</b><br><b>(0.08,0.76)</b> | 0.67<br>(0.29,1.53)               | 0.81<br>(0.32,2.01)                | <b>0.21</b><br><b>(0.11,0.43)</b> |
| 3.14<br>(0.93,10.63)              | 1.63<br>(0.46,5.70)               | 1.07<br>(0.32,3.62)               | <b>3.97</b><br><b>(1.32,11.92)</b> | <b>STE</b>                        | 2.64<br>(0.92,7.56)               | 3.20<br>(0.88,11.56)               | 0.85<br>(0.32,2.24)               |
| 1.19<br>(0.43,3.26)               | 0.62<br>(0.22,1.73)               | 0.41<br>(0.13,1.29)               | 1.50<br>(0.65,3.44)                | 0.38<br>(0.13,1.08)               | <b>CHL</b>                        | 1.21<br>(0.39,3.74)                | <b>0.32</b><br><b>(0.15,0.69)</b> |
| 0.98<br>(0.33,2.91)               | 0.51<br>(0.16,1.63)               | <b>0.34</b><br><b>(0.11,1.00)</b> | 1.24<br>(0.50,3.10)                | 0.31<br>(0.09,1.13)               | 0.83<br>(0.27,2.56)               | <b>RTX</b>                         | <b>0.26</b><br><b>(0.10,0.71)</b> |
| <b>3.71</b><br><b>(1.55,8.90)</b> | 1.92<br>(0.75,4.94)               | 1.27<br>(0.45,3.56)               | <b>4.69</b><br><b>(2.32,9.47)</b>  | 1.18<br>(0.45,3.12)               | <b>3.12</b><br><b>(1.45,6.71)</b> | <b>3.78</b><br><b>(1.41,10.09)</b> | <b>CON</b>                        |
